# Supplementary material for: Bright NIR-Emitting Styryl Pyridinium Dyes with Large Stokes’ Shift for Sensing Applications
Source: MDPI journal article supplement (doi:10.3390/bios13080799), 2023-08-09
Supplement: s1 [file s1]

# **Bright NIR-Emitting Styryl Pyridinium Dyes with Large Stokes' Shift for Sensing Applications**

## **Supporting Information**

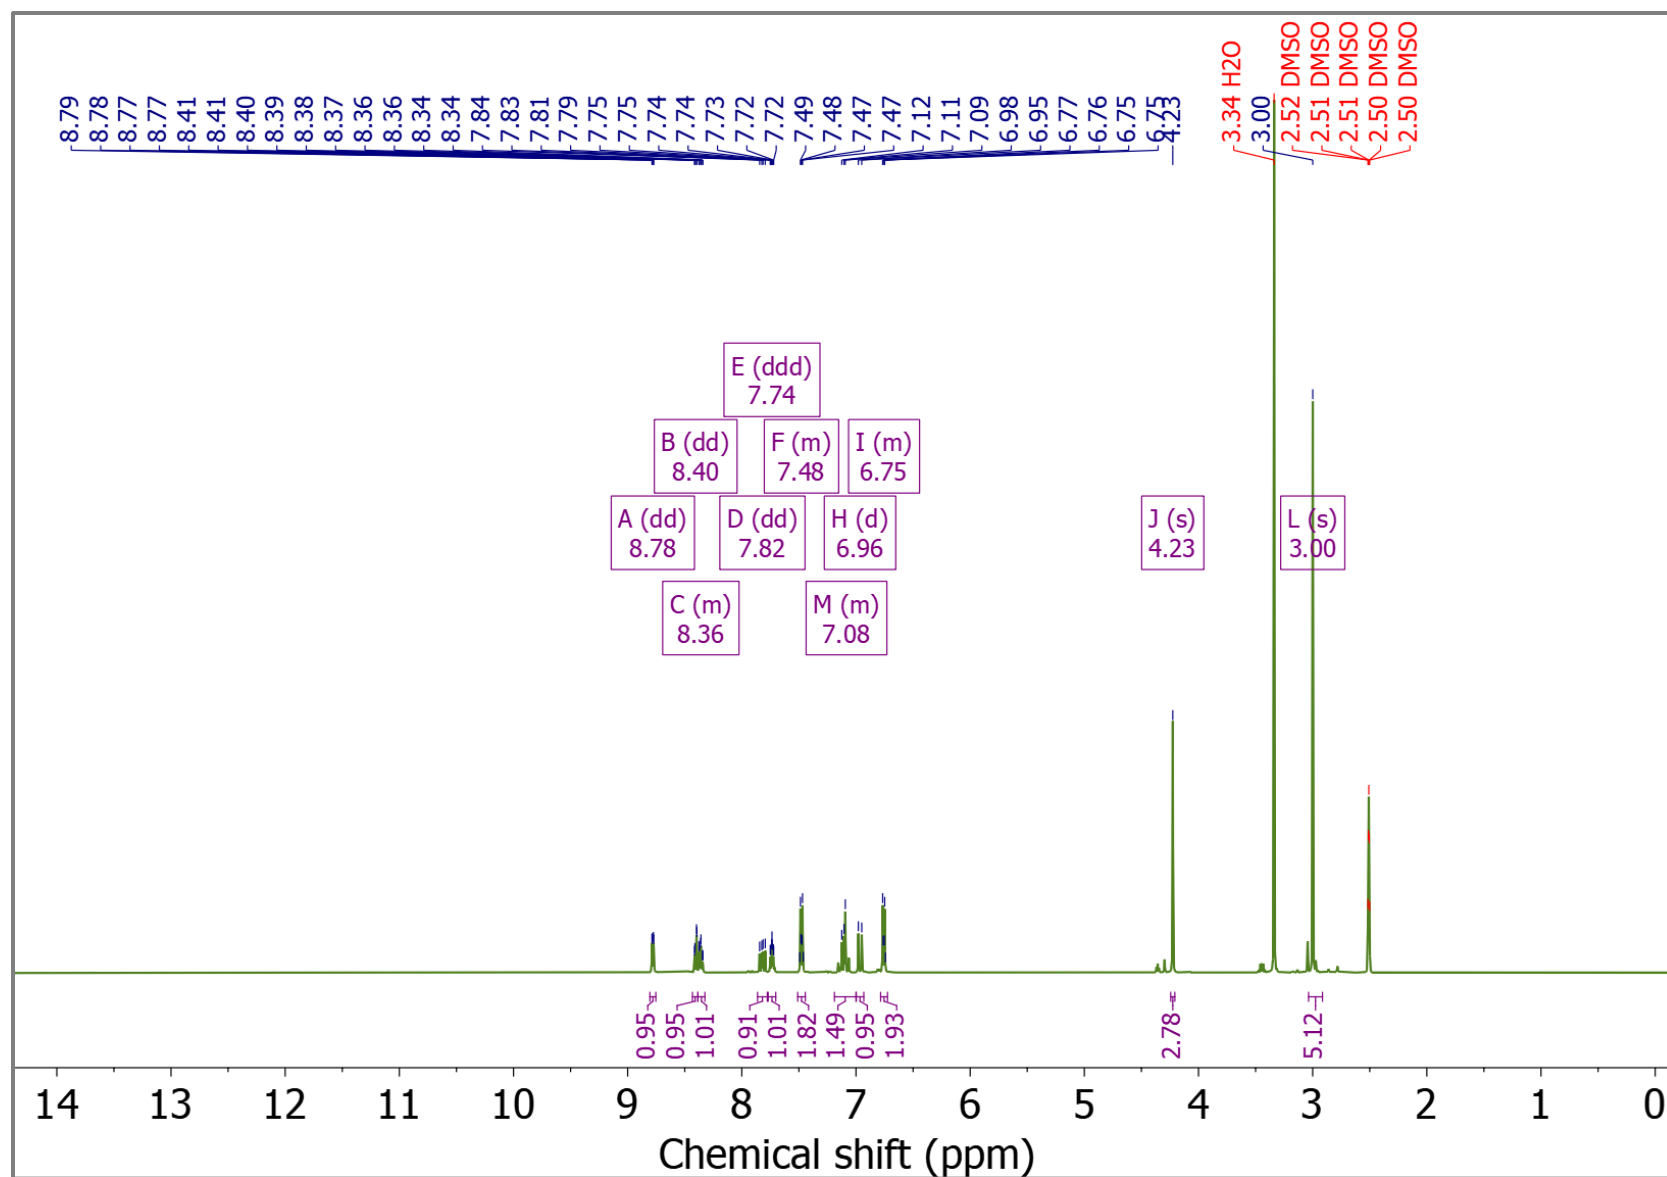

**Figure S1.1**  $^1\text{H}$  NMR spectra of **1a** (500 MHz in DMSO- $d_6$ ).

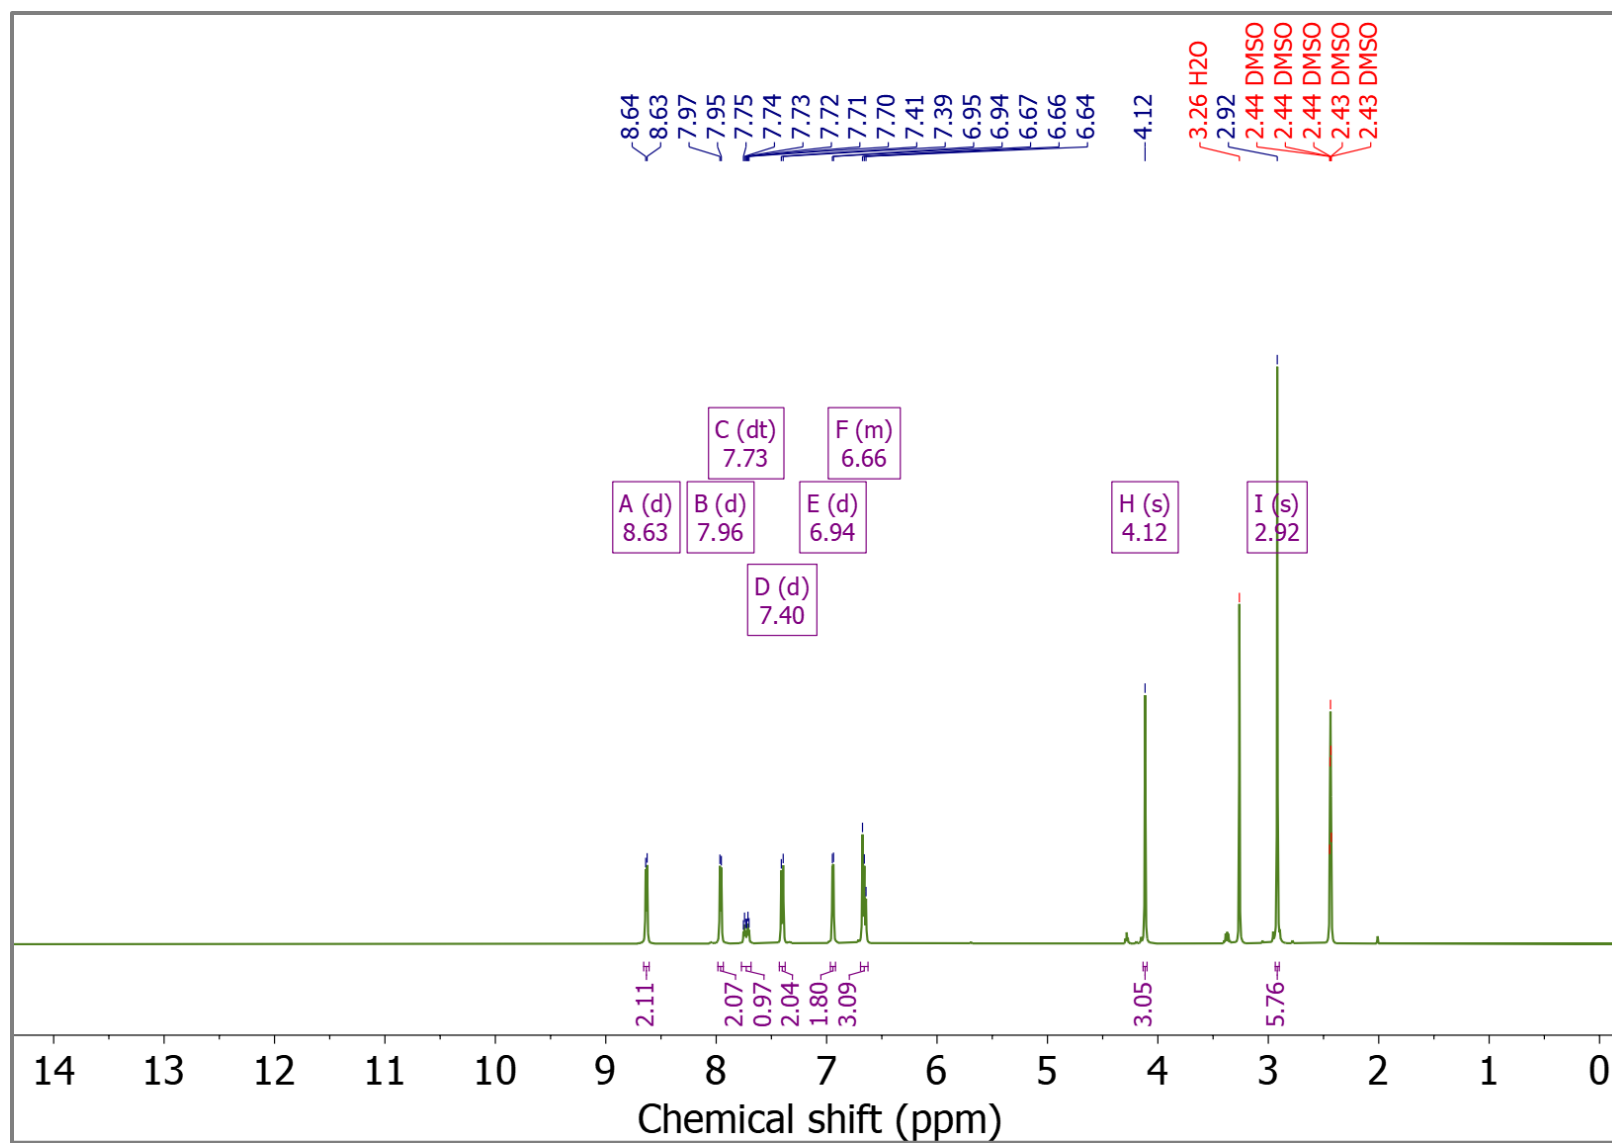

**Figure S1.2** <sup>1</sup>H NMR spectra of **1b** (500 MHz in DMSO-*d*<sub>6</sub>).

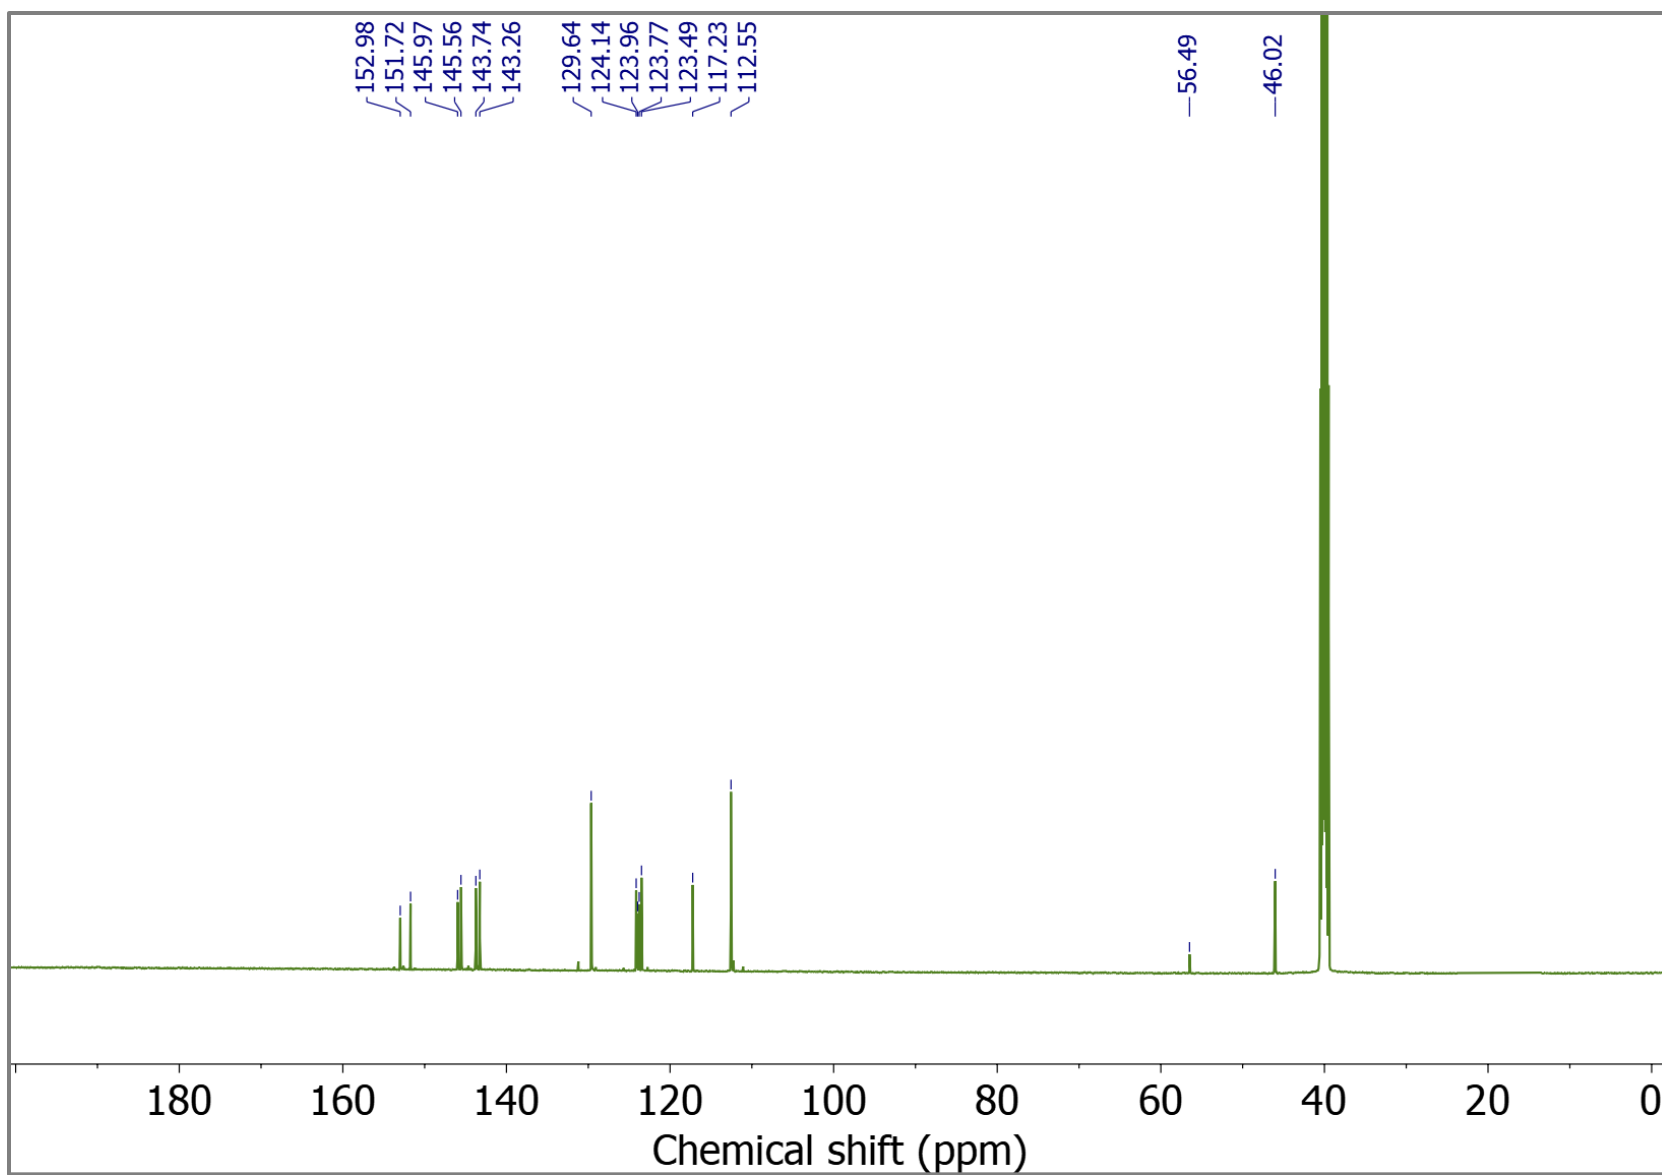

**Figure S1.3**  $^{13}\text{C}$  NMR spectra of **1a** (126 MHz in  $\text{DMSO-}d_6$ ).

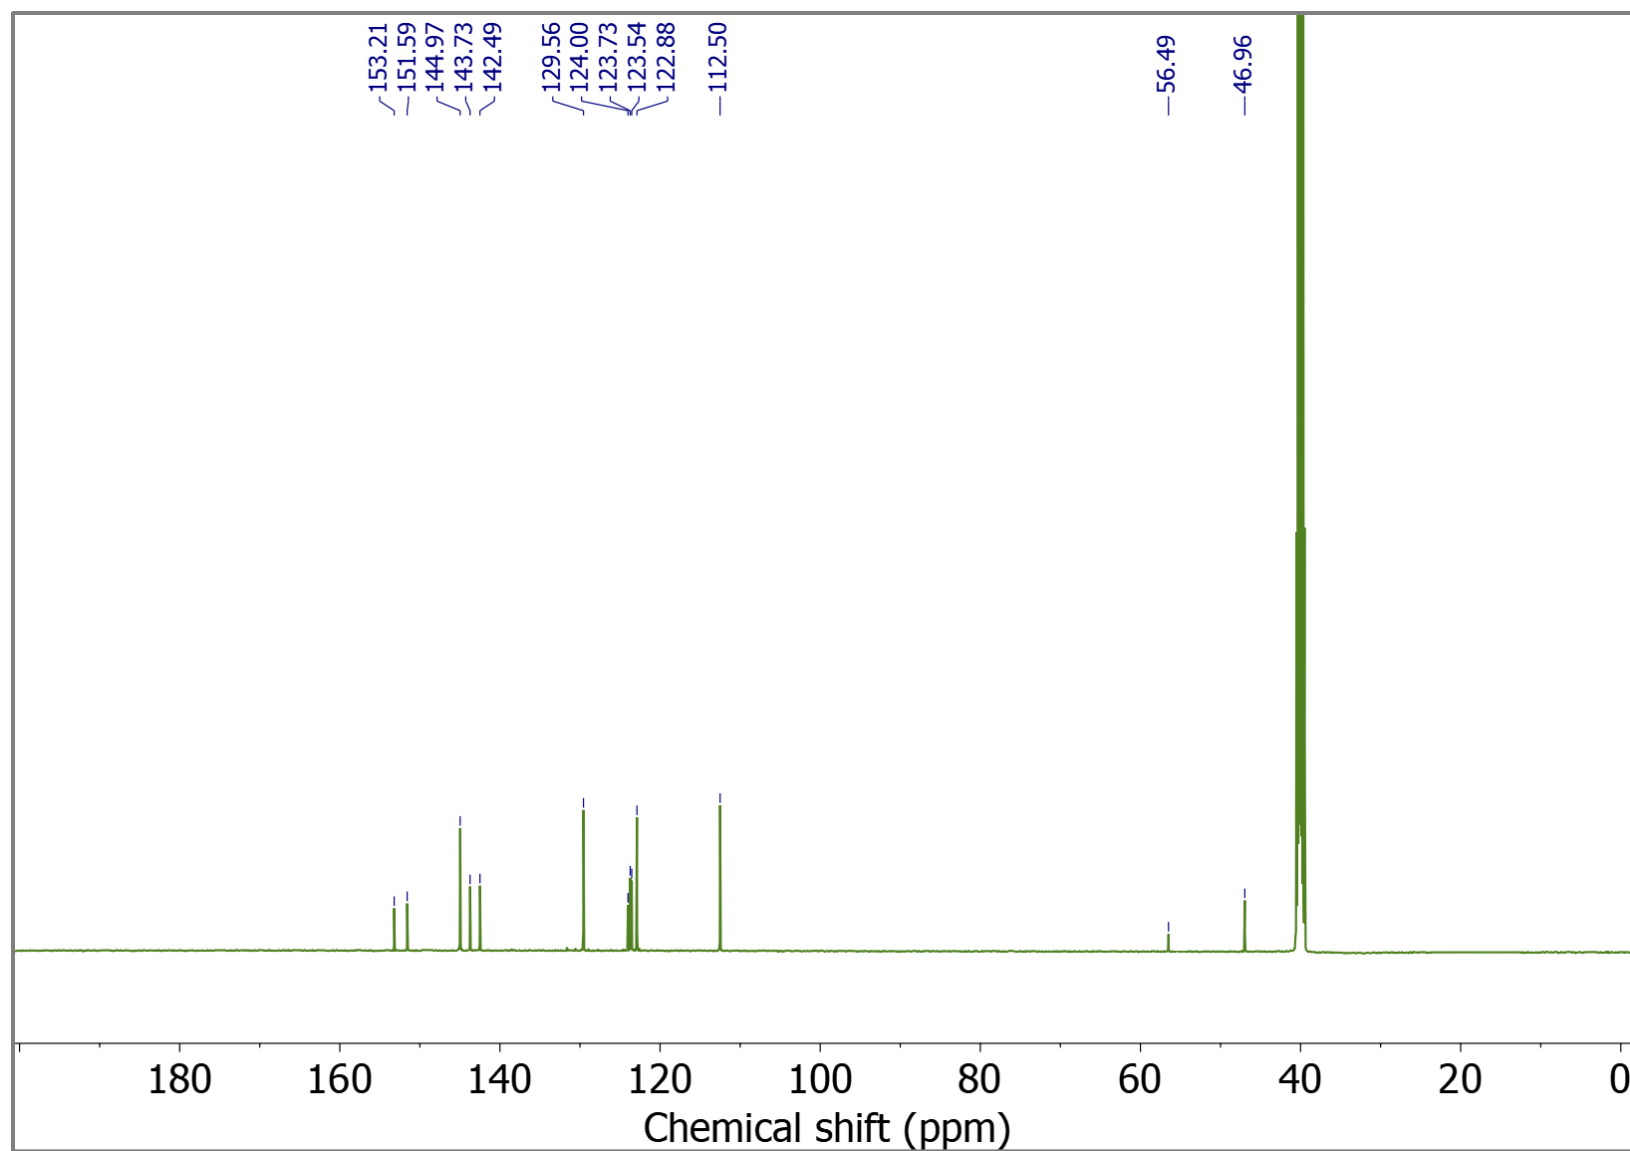

**Figure S1.4** <sup>13</sup>C NMR spectra of **1b** (126 MHz in DMSO-*d*<sub>6</sub>).

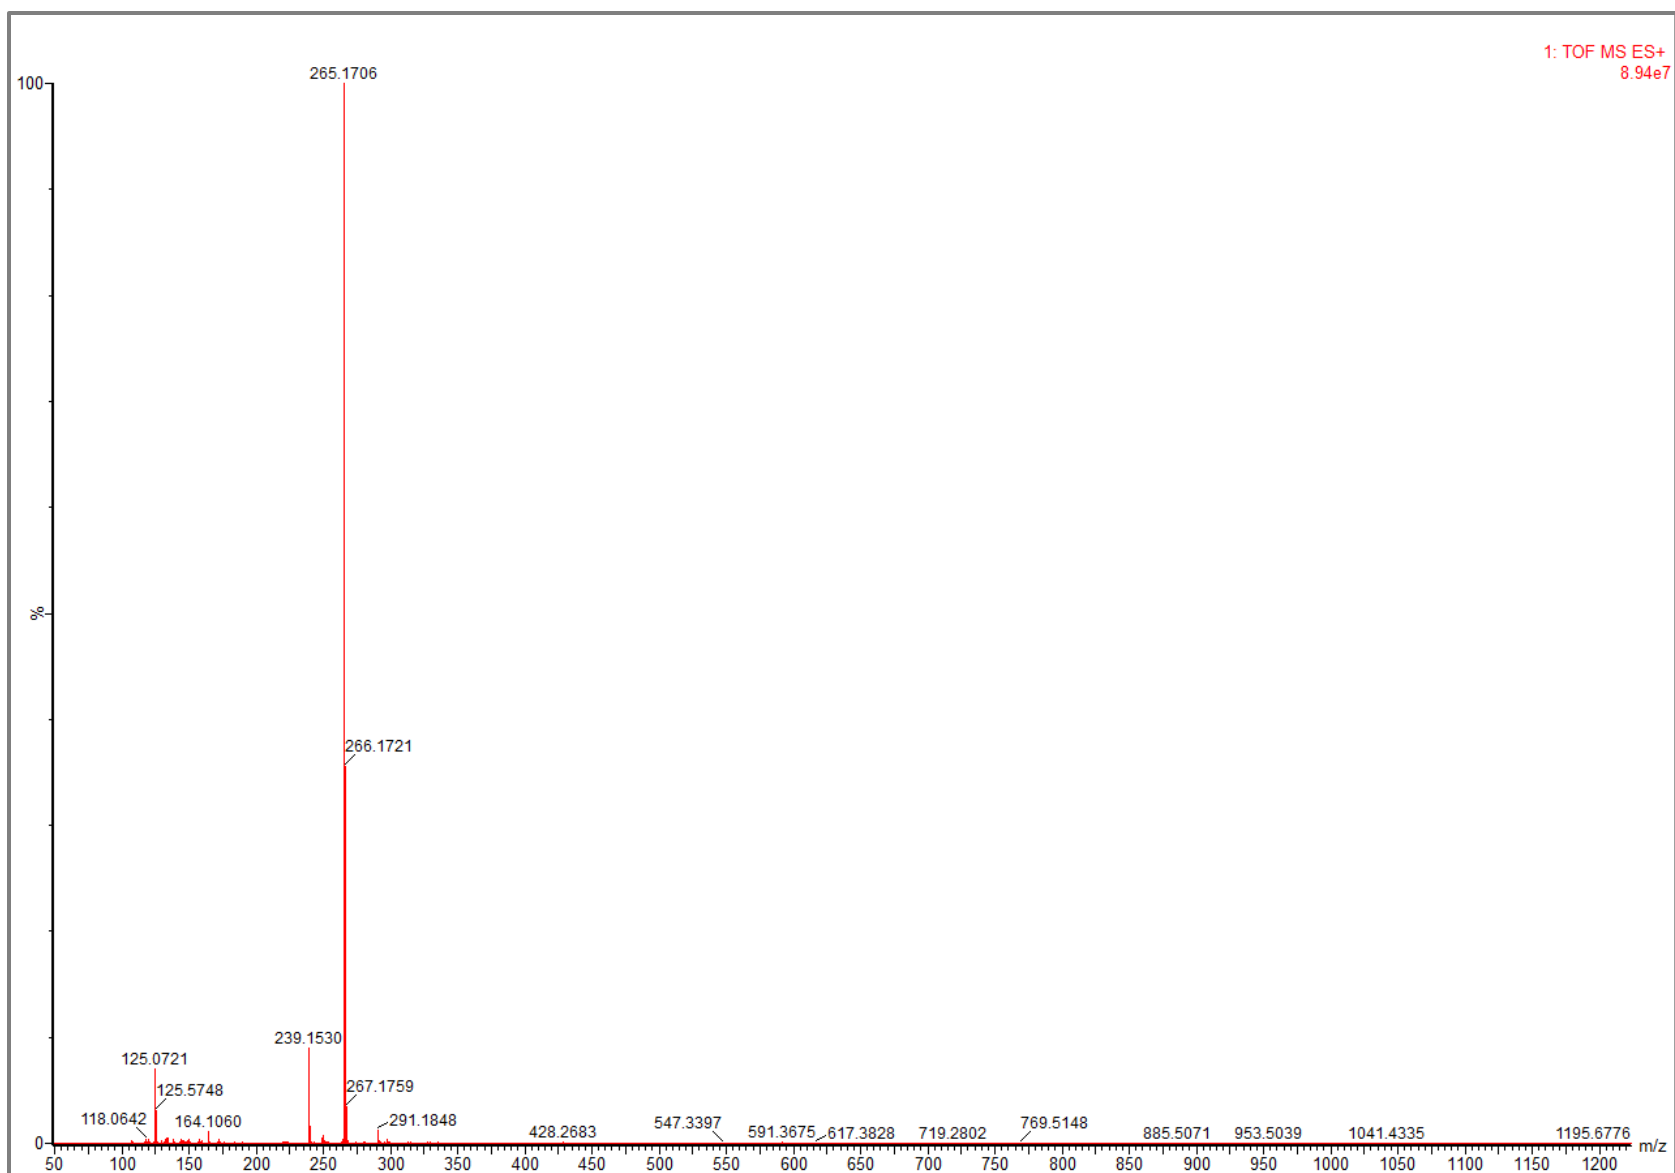

**Figure S1.5** High-resolution mass spectra (TOF MS ES+) of **1a**.

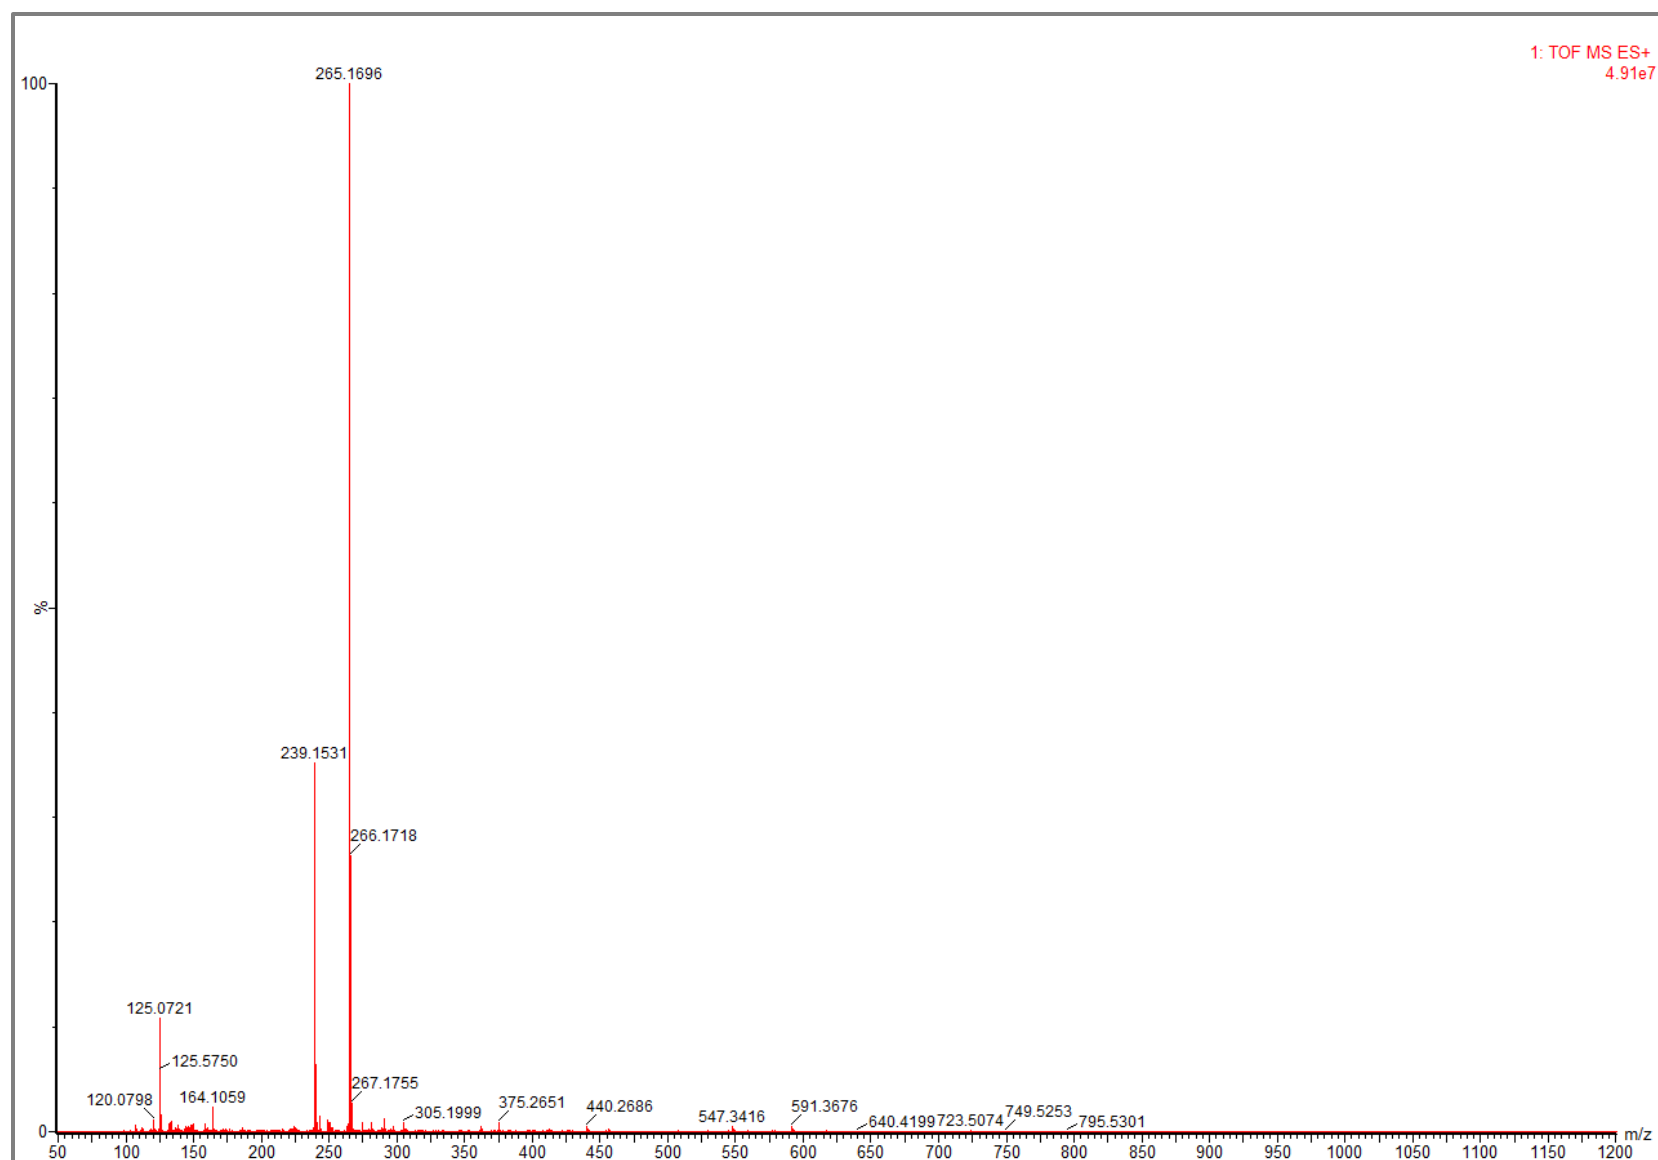

**Figure S1.6** High-resolution mass spectra (TOF MS ES+) of **1b**.

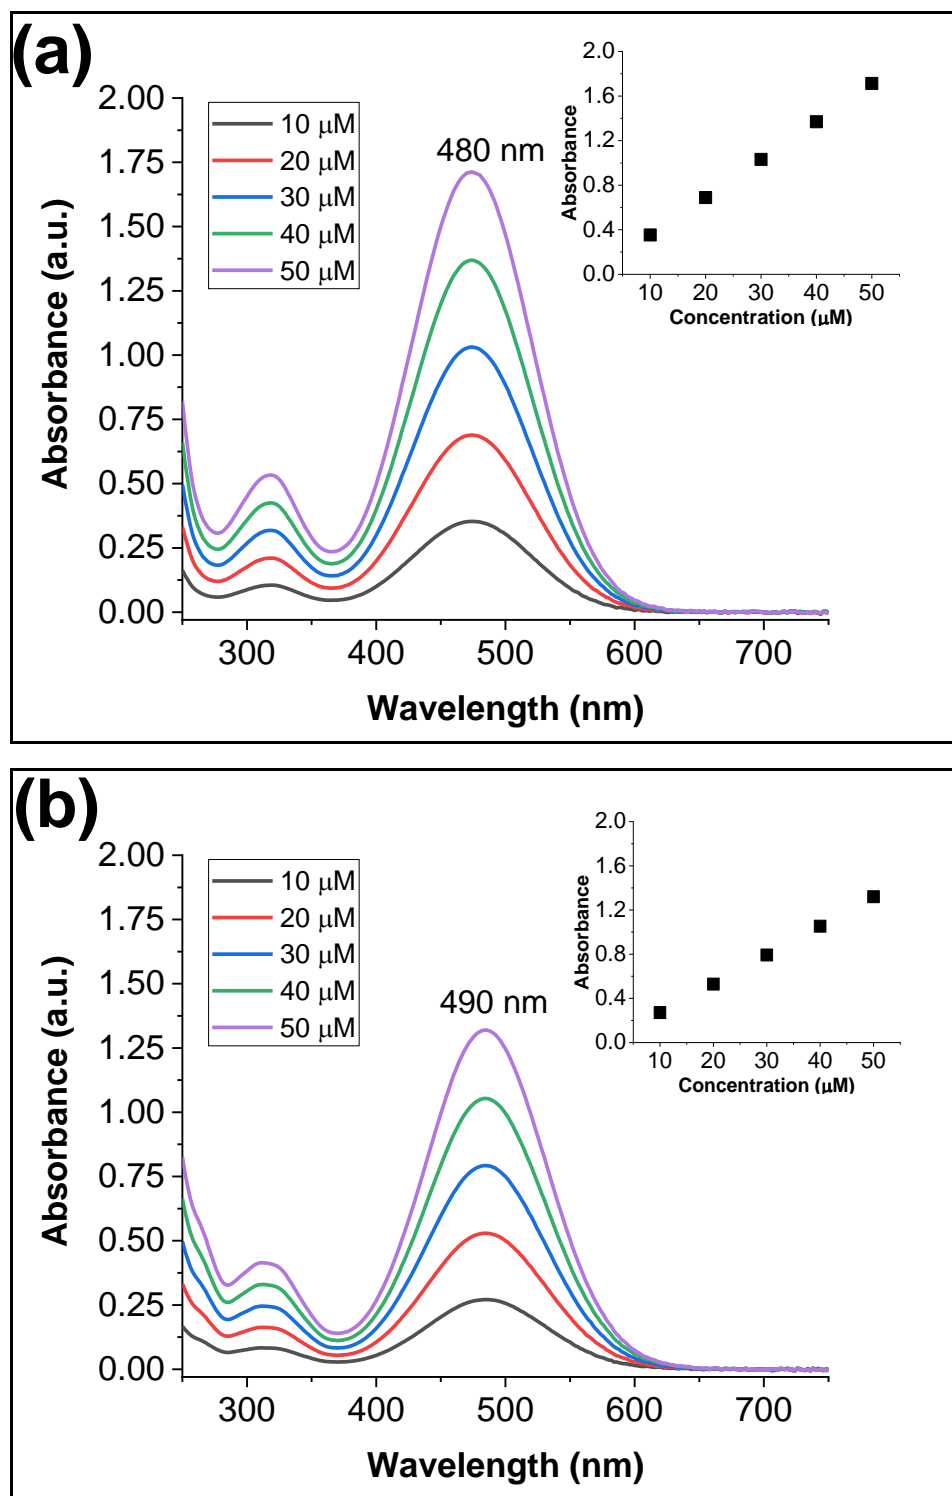

**Figure S2.1** Absorbance spectra acquired for probe **1a** (a) and **1b** (b) under different concentrations at room temperature.



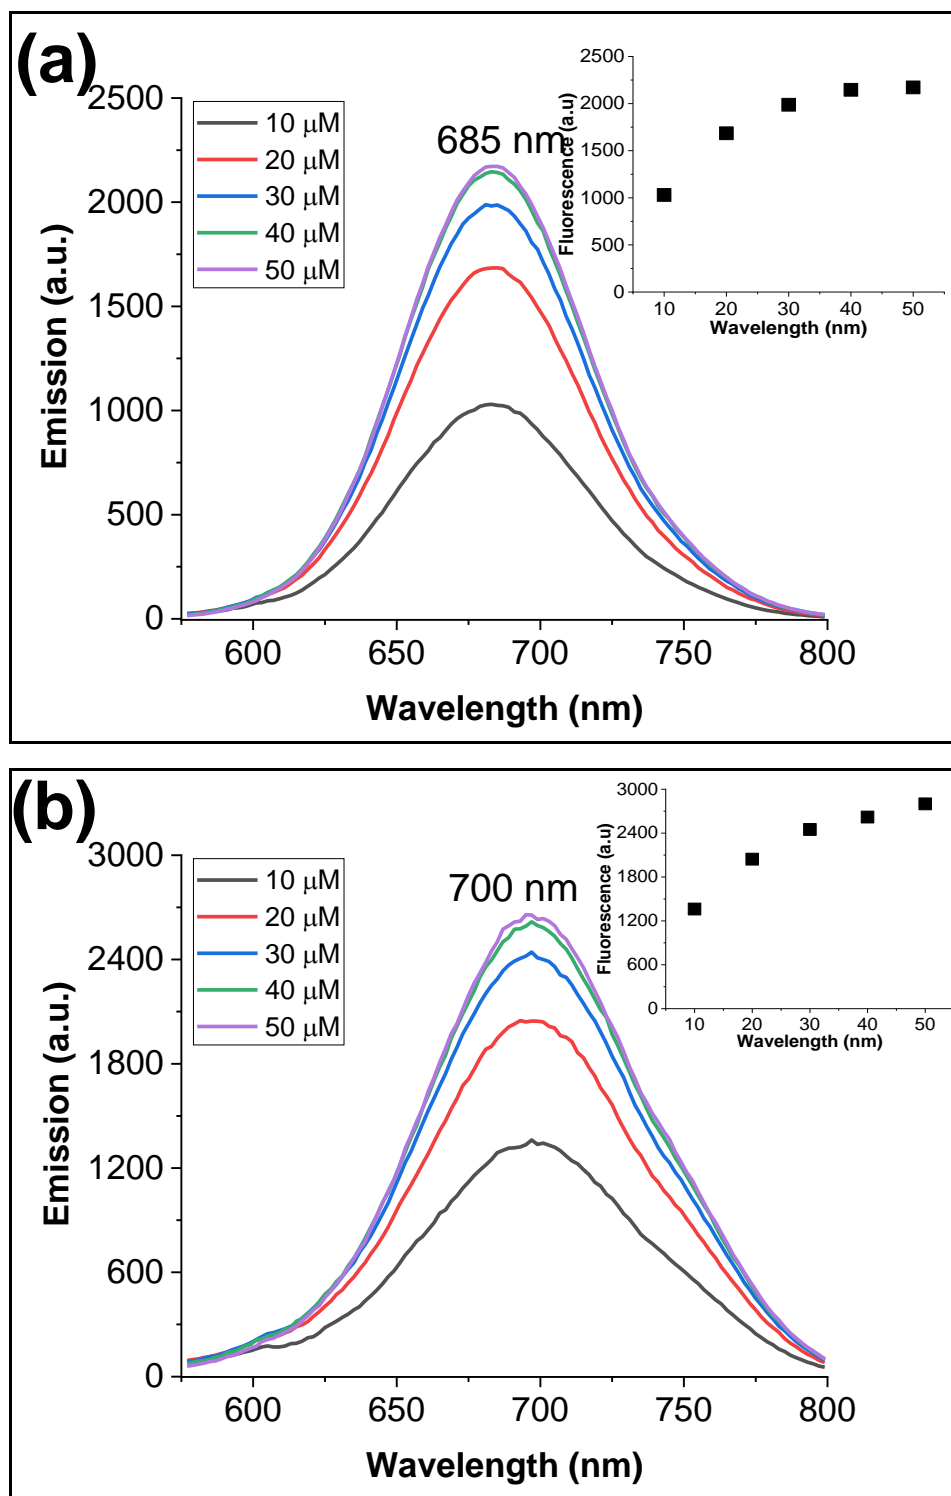

**Figure S2.2** Emission spectra acquired for probe **1a** (a) and **1b** (b) under different concentrations at room temperature. Probes were excited at 500 nm and the emissions were collected from 530nm to 800 nm.

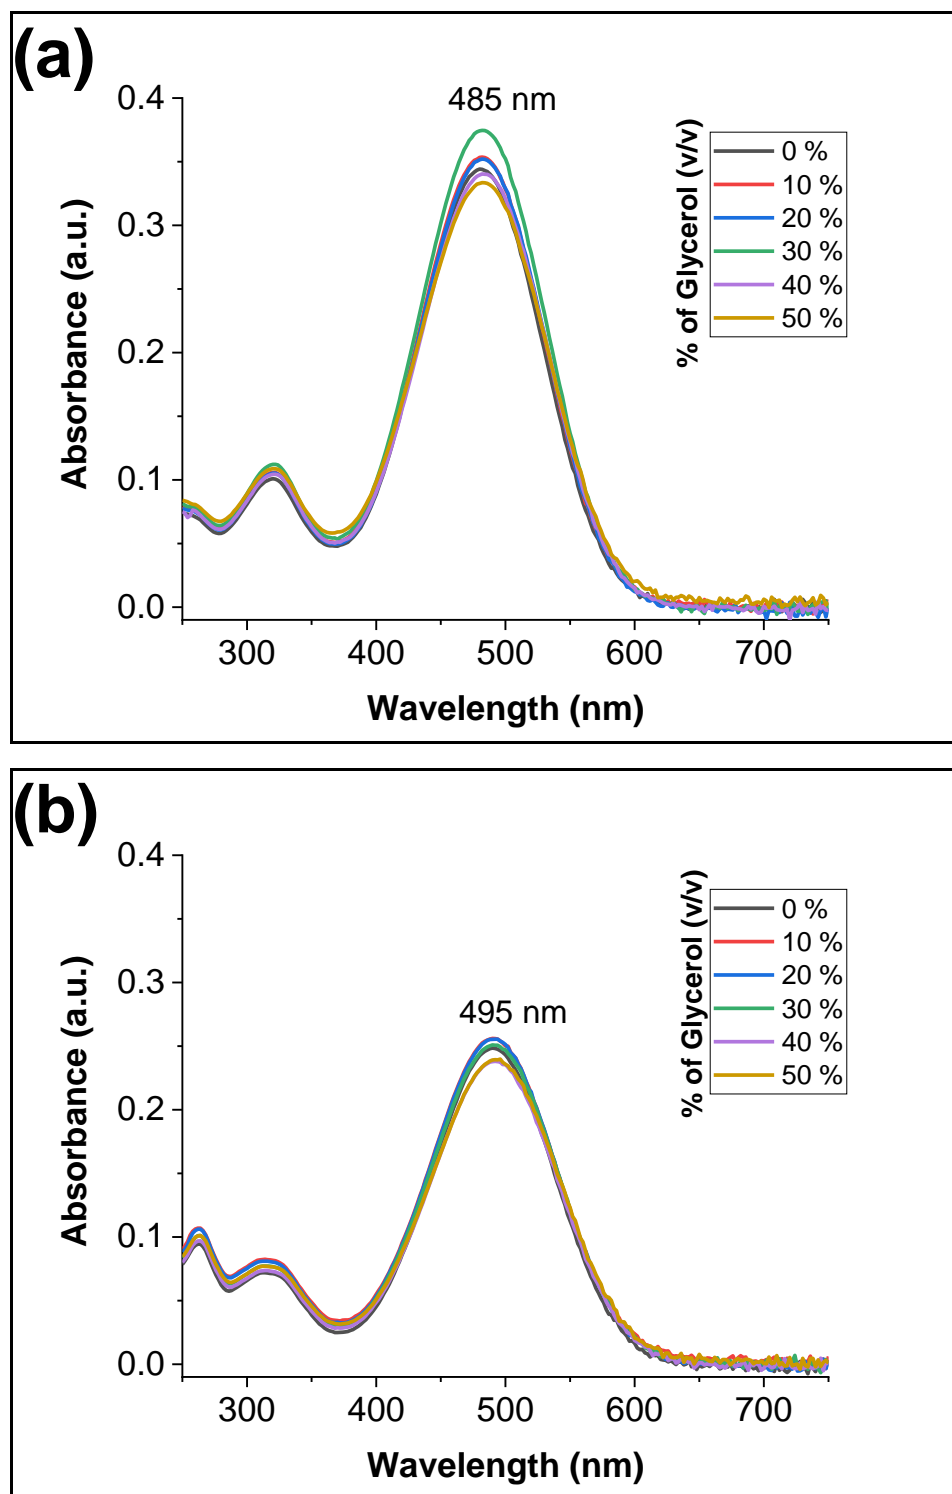

**Figure S3.1** Absorbance spectra acquired for probe **1a** (a) and **1b** (b) in different Glycerol:MeOH % at room temperature.

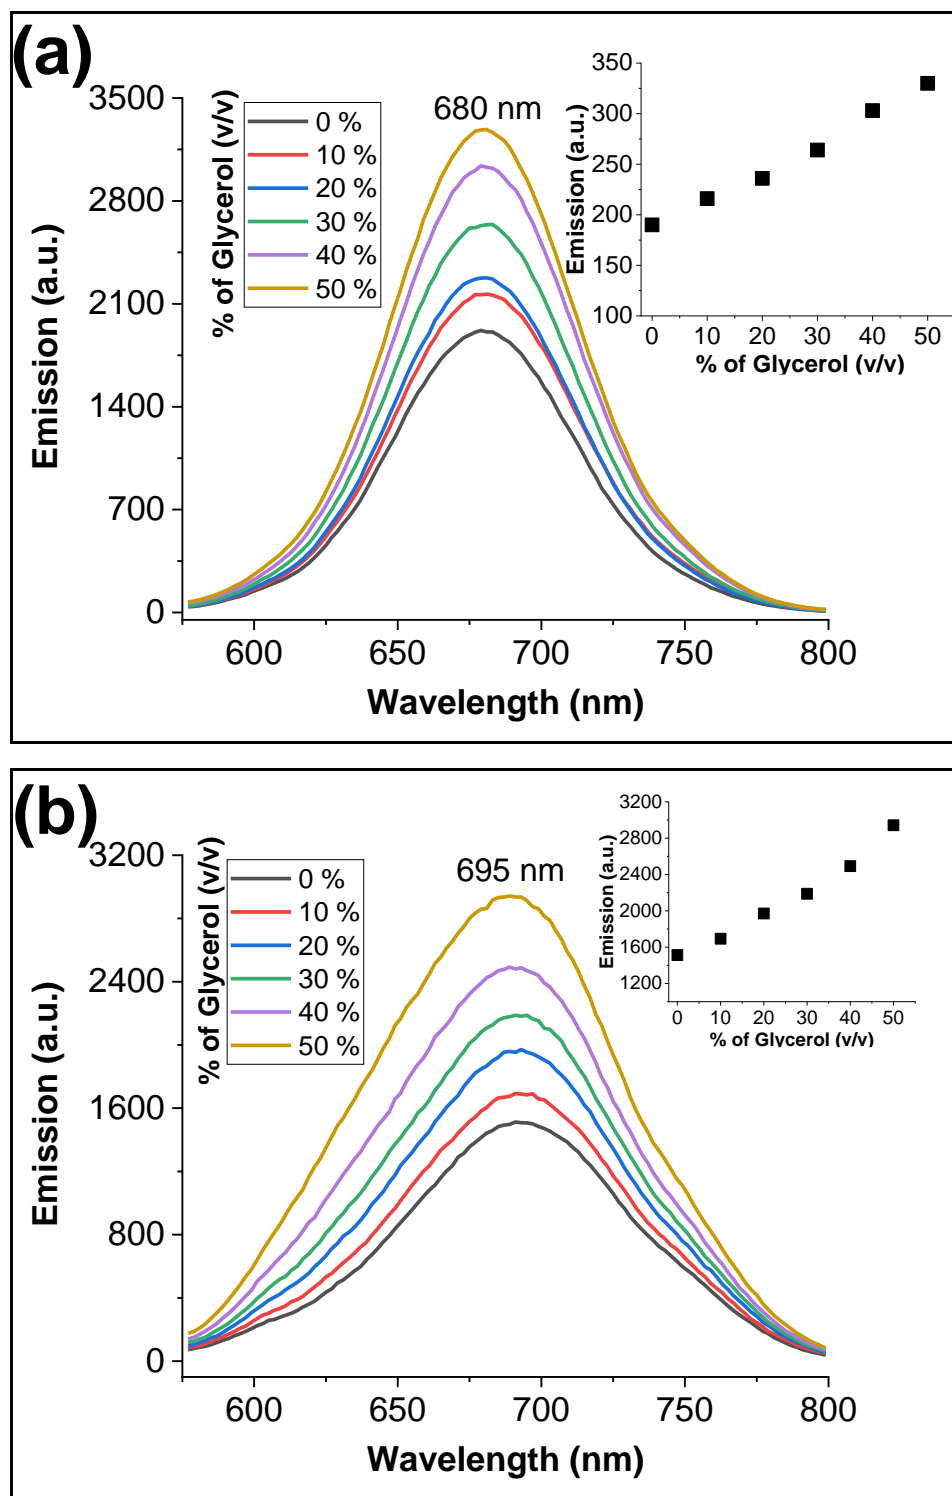

**Figure S3.2** Emission spectra acquired for probe **1a** (a) and **1b** (b) in different Glycerol:MeOH % at room temperature. Probes were excited at 500 nm and the emissions were collected from 530nm to 800 nm.

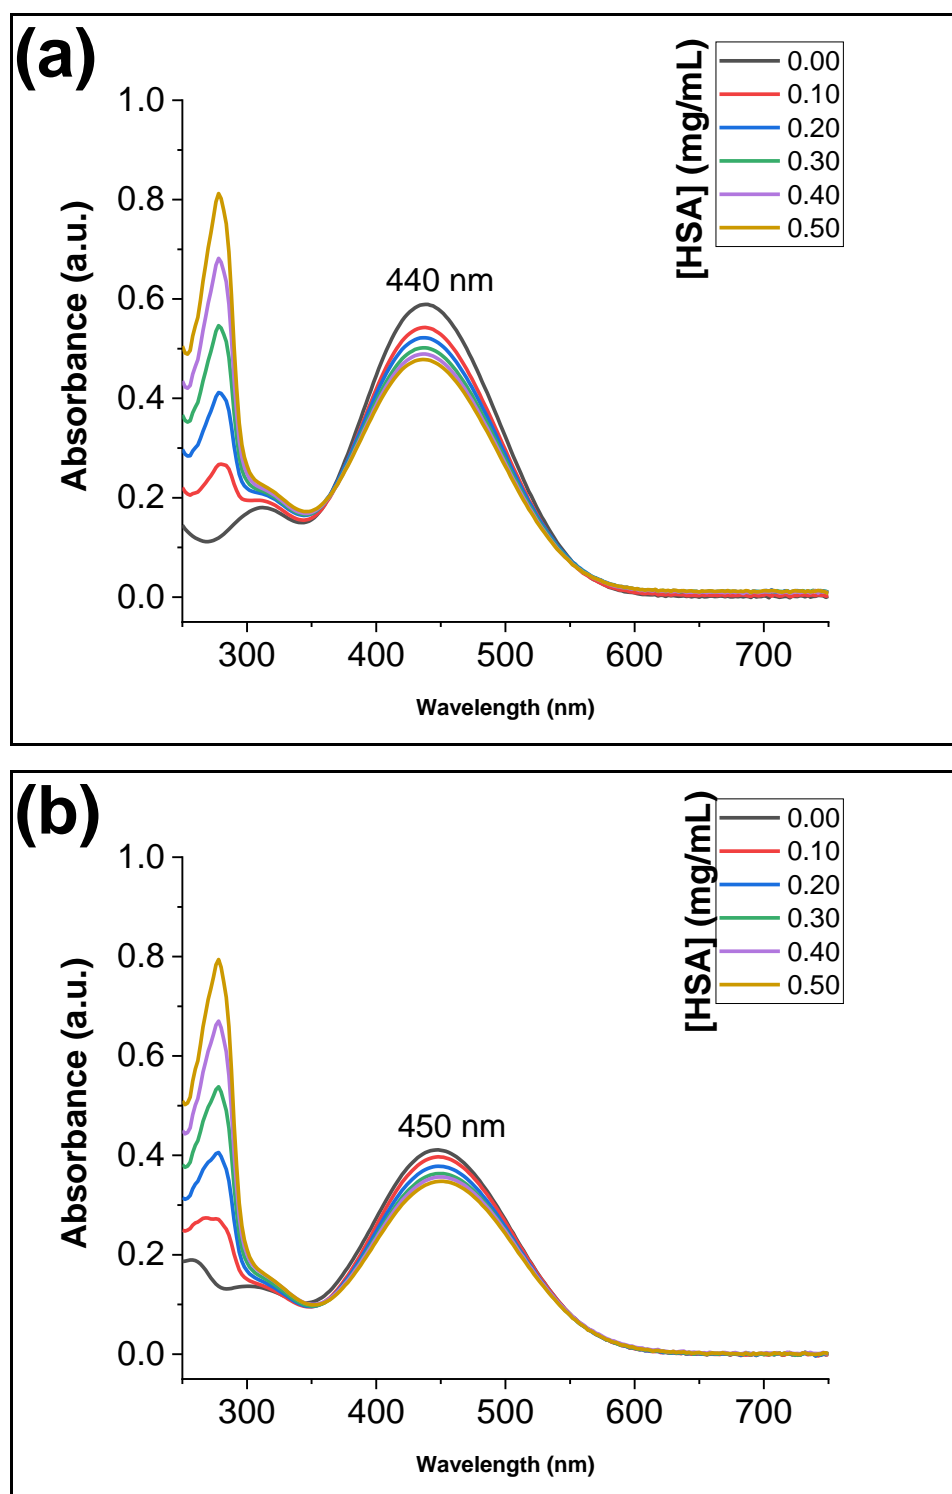

**Figure S4.1** Absorbance spectra acquired for probe **1a** (a) and **1b** (b) ( $10 \times 10^{-6}$  M) with the spectrometric titration with 5 % HSA in water at room temperature.

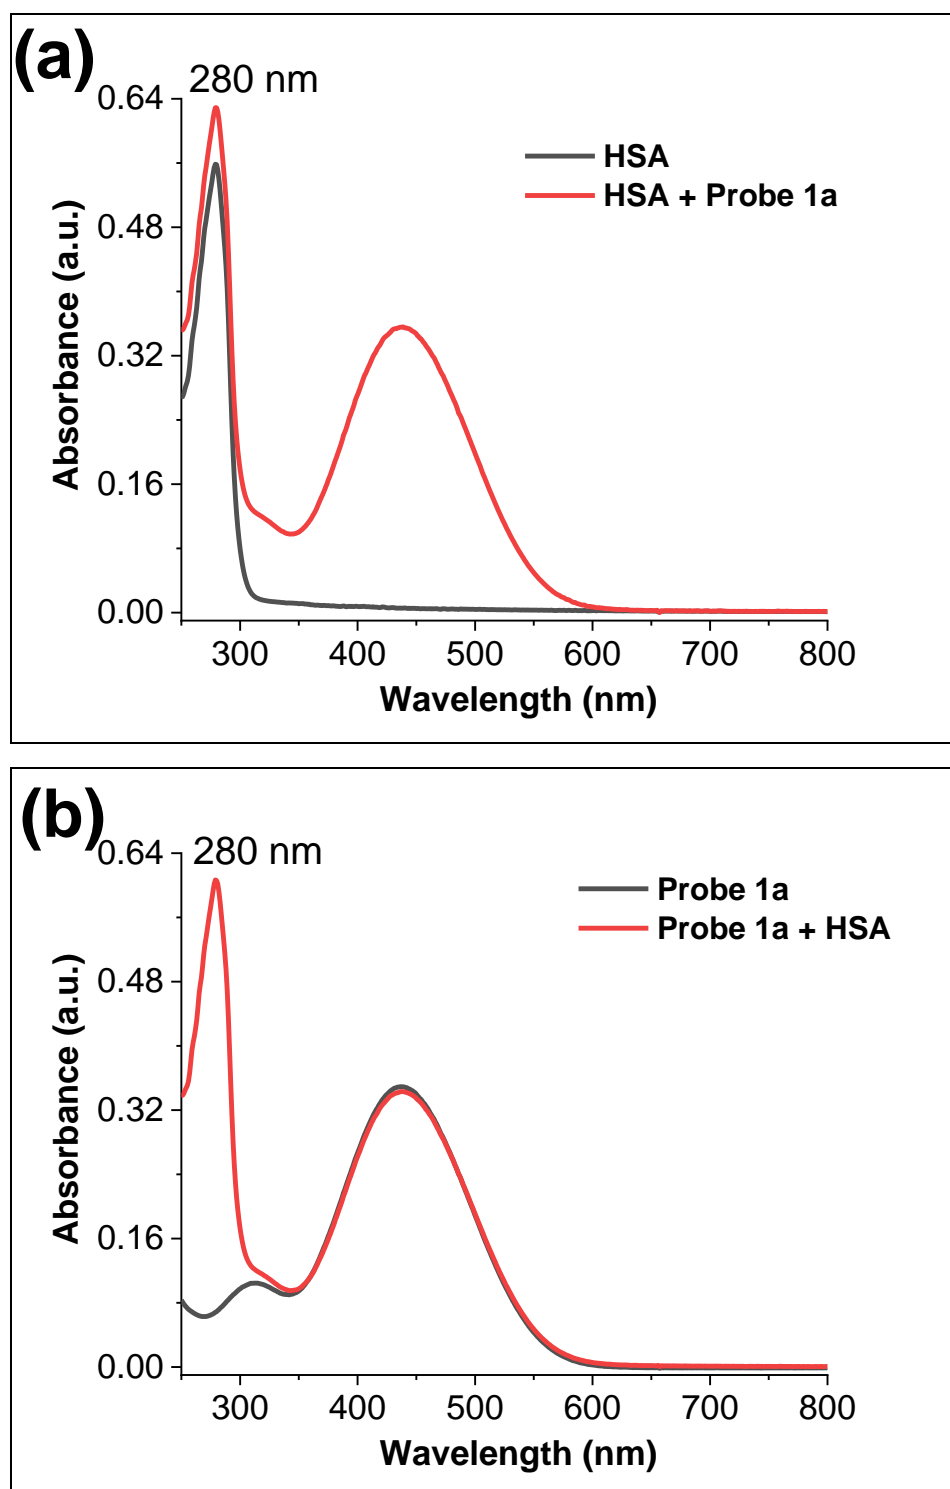

**Figure S4.2** Absorbance spectra acquired for probe **1a** ( $10 \times 10^{-6}$  M) with the different addition sequences of HSA (1.1 equivalent) in water at room temperature.

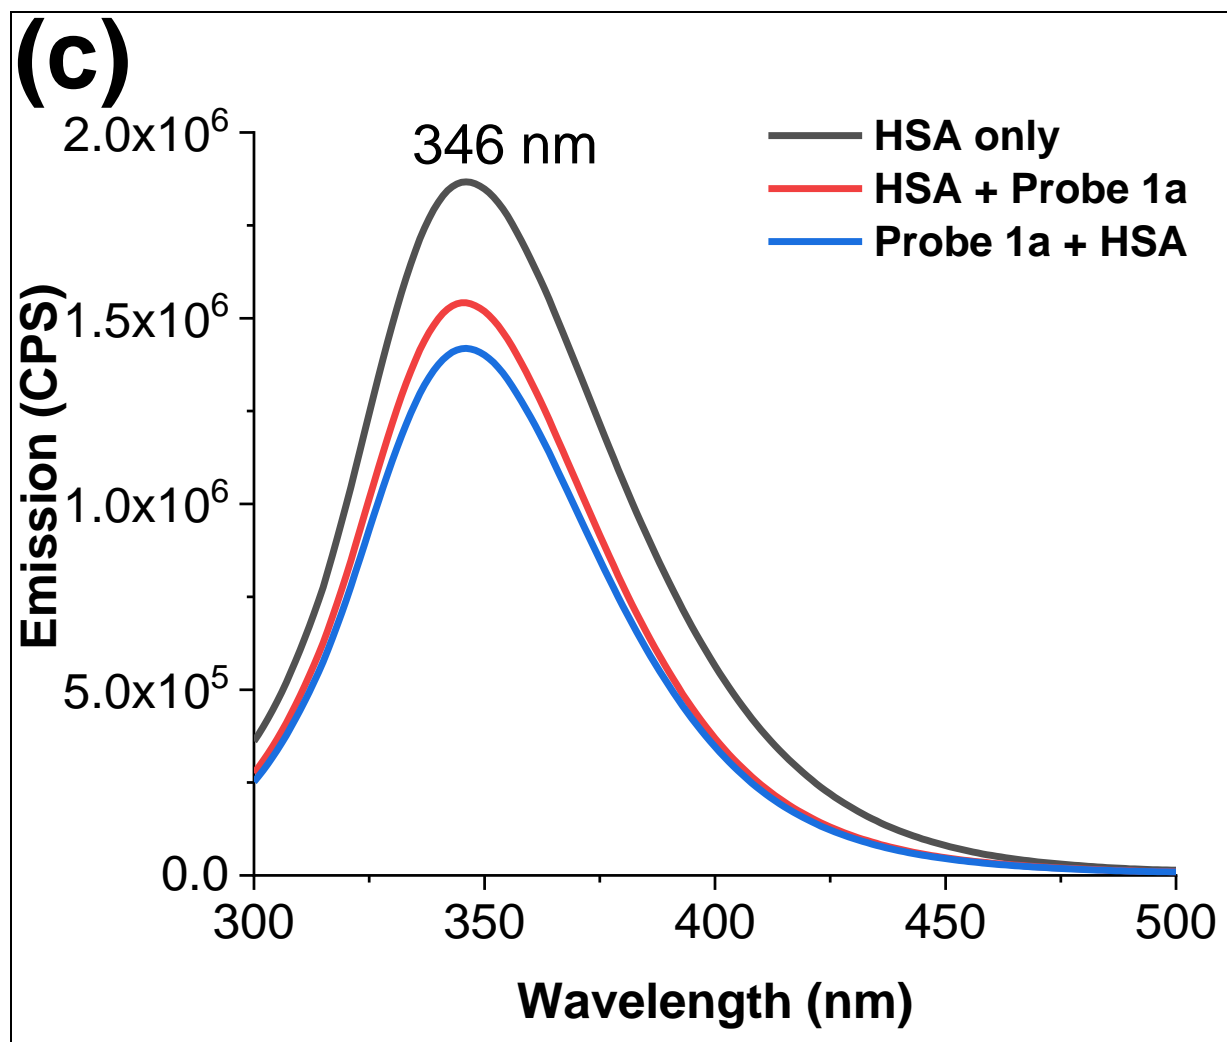

**Figure S4.3** The intrinsic fluorescence spectra acquired for HSA ( $1.1 \times 10^{-5}$  M) with different addition sequences of probe **1a**. The spectra represent the emission of HSA only (black), emission of HSA+**1a** (red) and emission of **1a**+HSA. The emission spectra were recorded by exciting the solution at 280 nm while collecting emission from 295 nm to 500 nm.

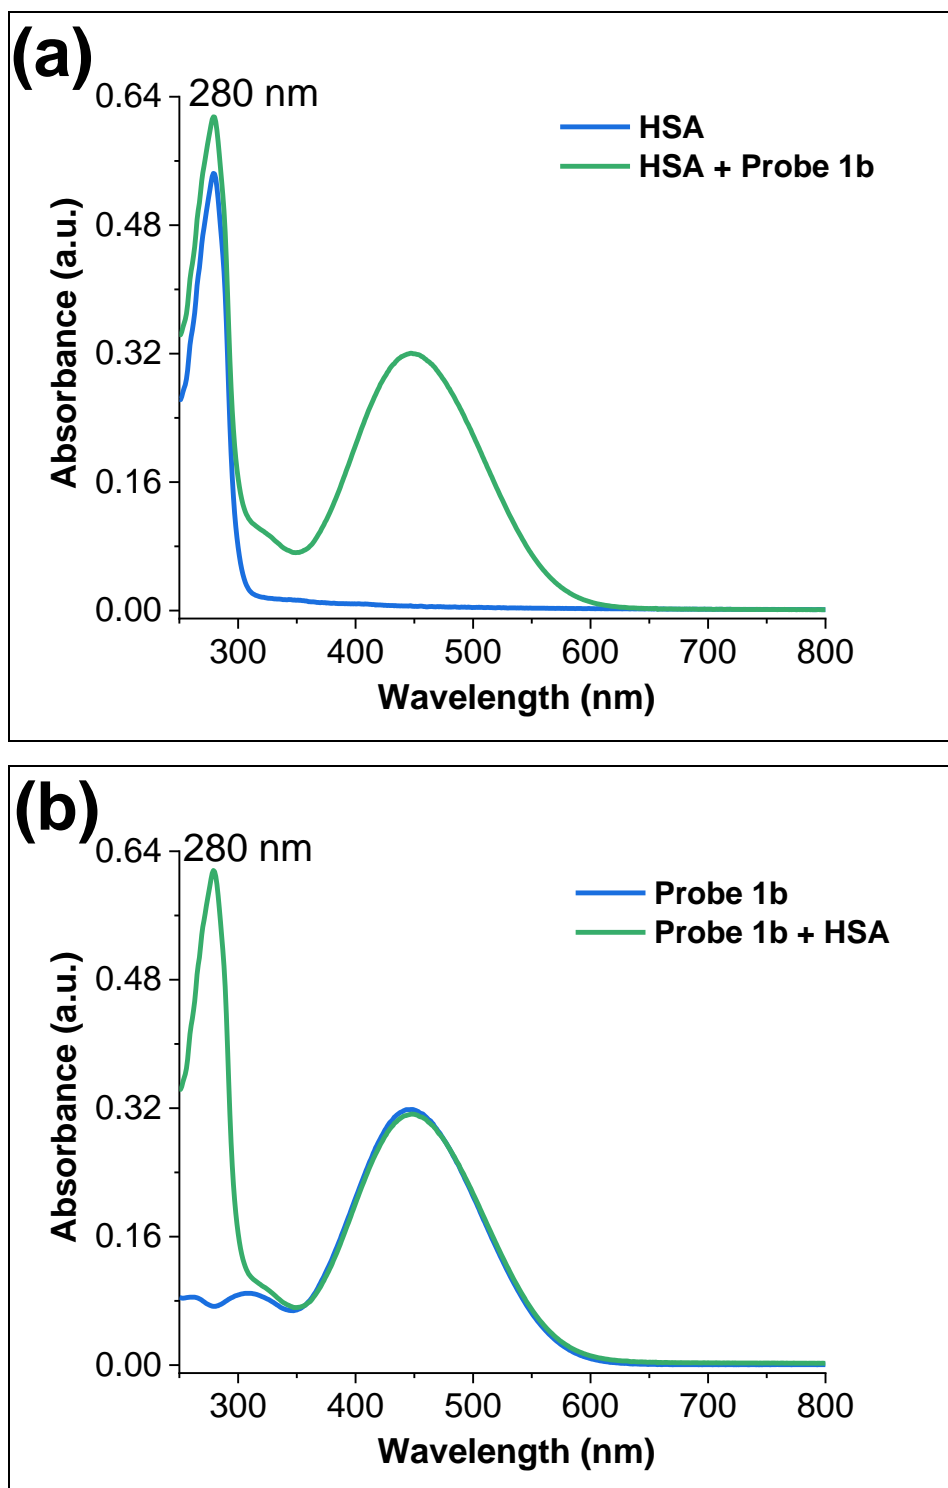

**Figure S4.4** Absorbance spectra acquired for probe **1b** ( $10 \times 10^{-6}$  M) with the different addition sequences of HSA (1.1 equivalent) in water at room temperature.

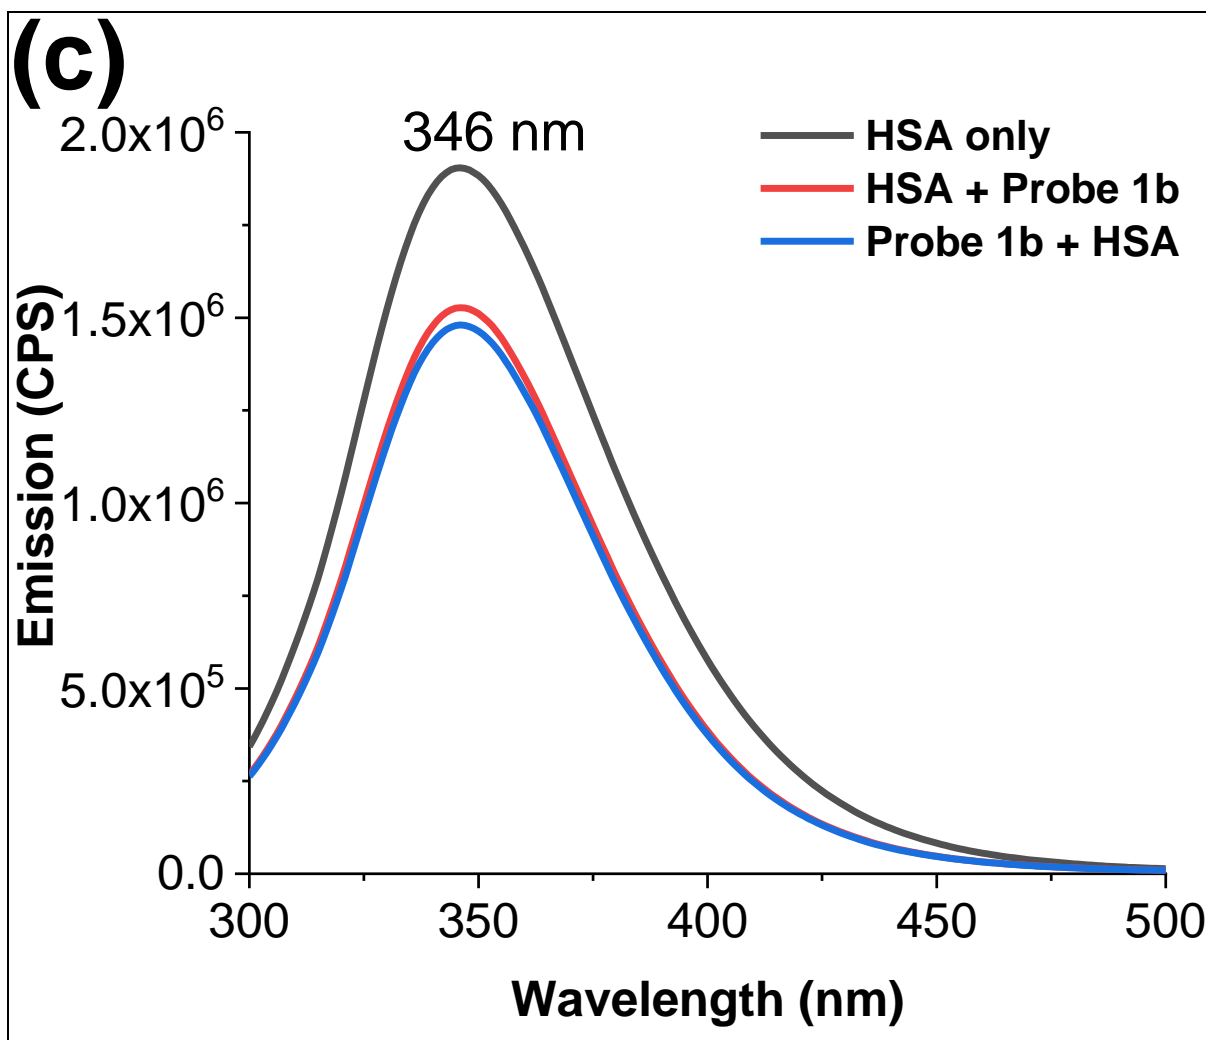

**Figure S4.5** The intrinsic fluorescence spectra acquired for HSA ( $1.1 \times 10^{-5}$  M) with different addition sequences of probe **1b**. The spectra represent the emission of HSA only (black), emission of HSA+**1b** (red) and emission of **1b**+HSA. The emission spectra were recorded by exciting the solution at 280 nm while collecting emission from 295 nm to 500 nm.



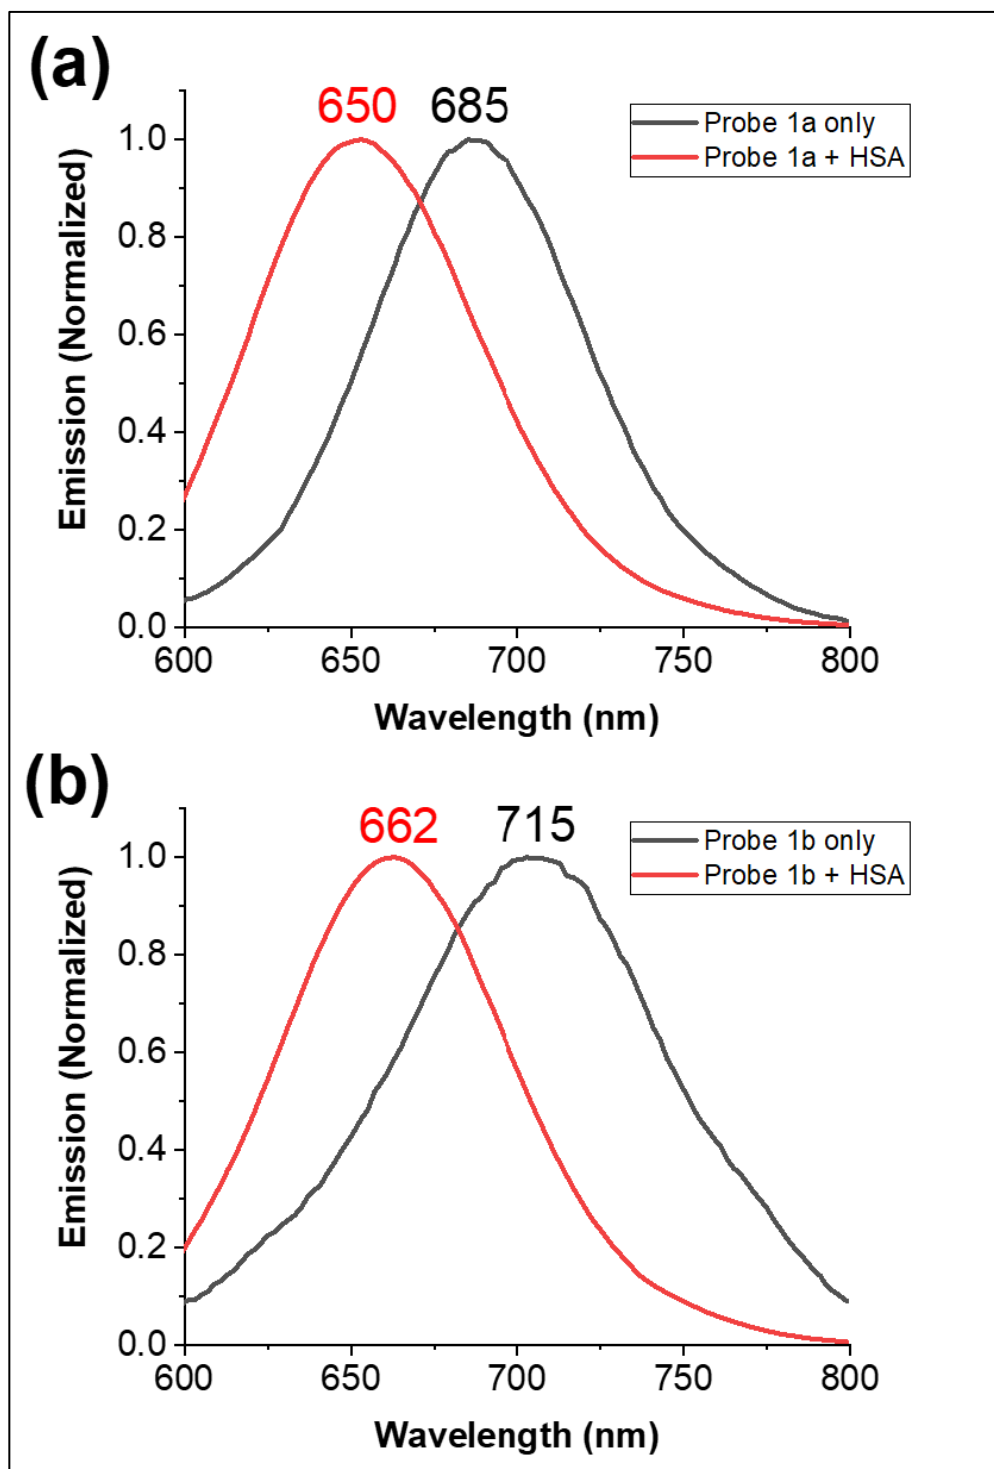

**Figure S4.6** The normalized emission recorded for probes **1a** (a) and **1b** (b) in the absence (grey line) and presence (red line) of 1 equivalence of HSA at room temperature

( Probe concentration:  $1.0 \times 10^{-6}$  M). Probes were excited at 520 nm and the emissions were collected from 550 nm to 800 nm,

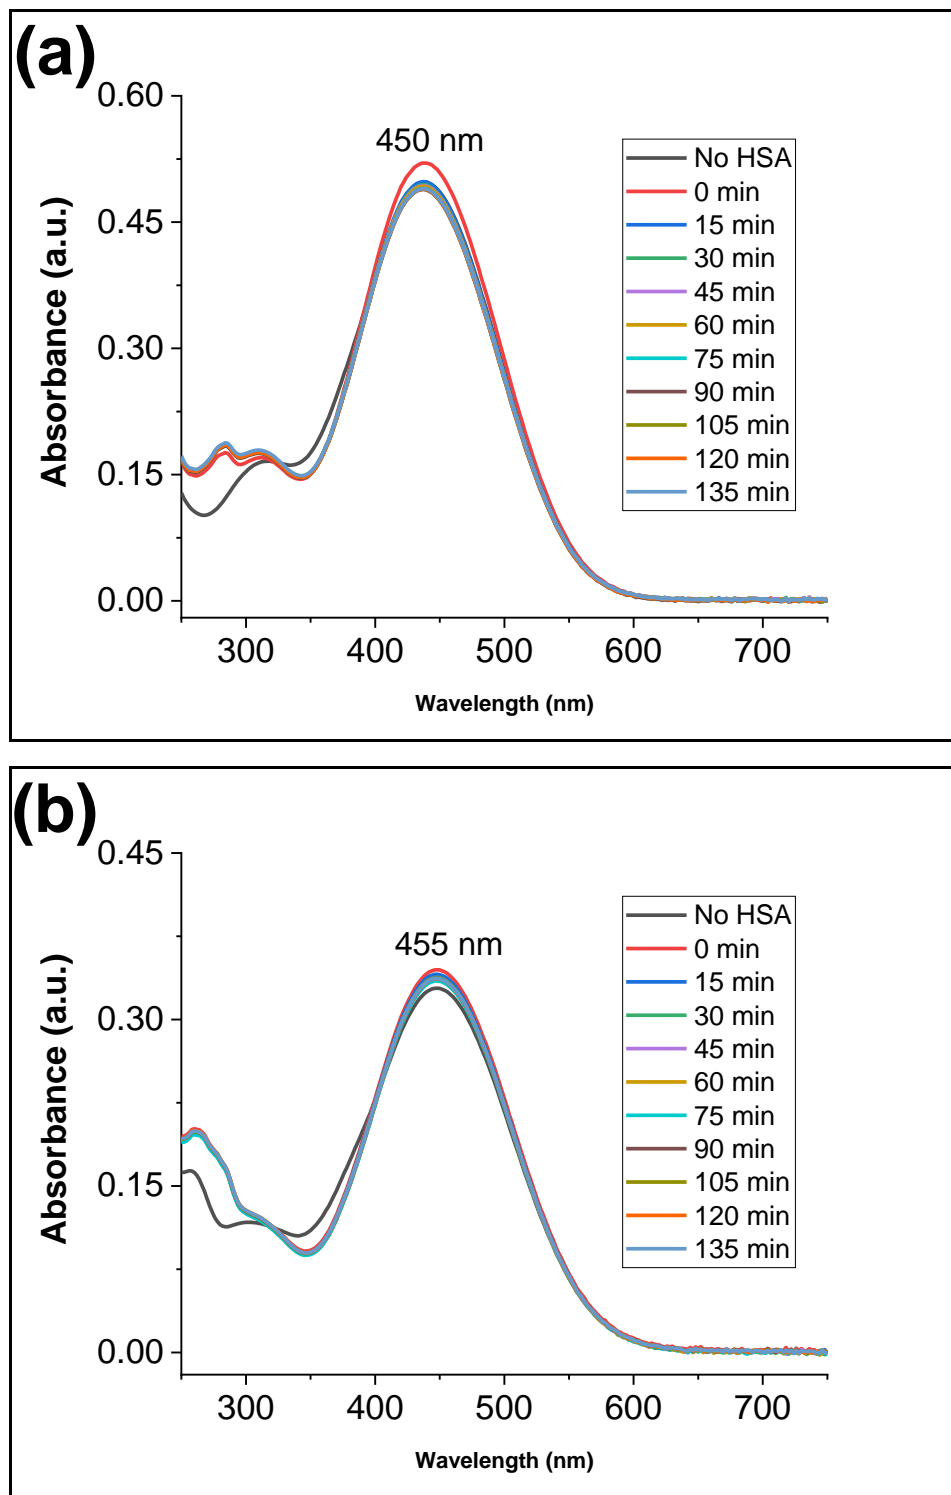

**Figure S5.1** Absorbance spectra acquired for probe **1a** (a) and **1b** (b) ( $10 \times 10^{-6}$  M) in the presence of HSA (0.5 mg/mL in water) over different time intervals at room temperature.

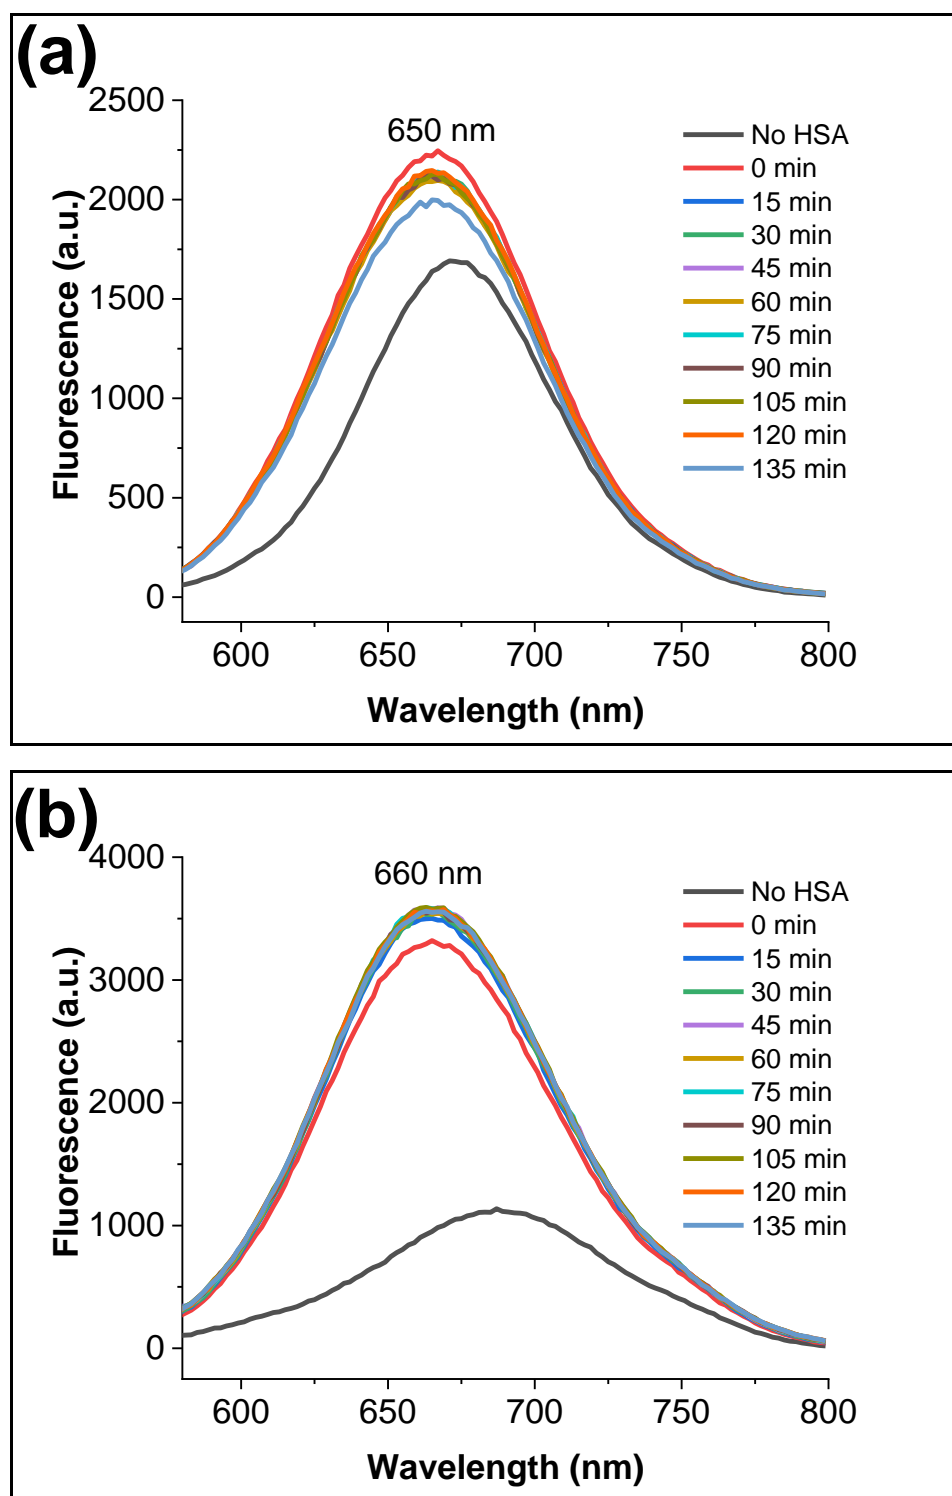

**Figure S5.2** Emission spectra acquired for probe **1a** (a) and **1b** (b) ( $10 \times 10^{-6}$  M) in the presence of HSA (0.5 mg/mL in water) over different time intervals at room temperature. Probes were excited at 500 nm and the emissions were collected from 530nm to 800 nm.

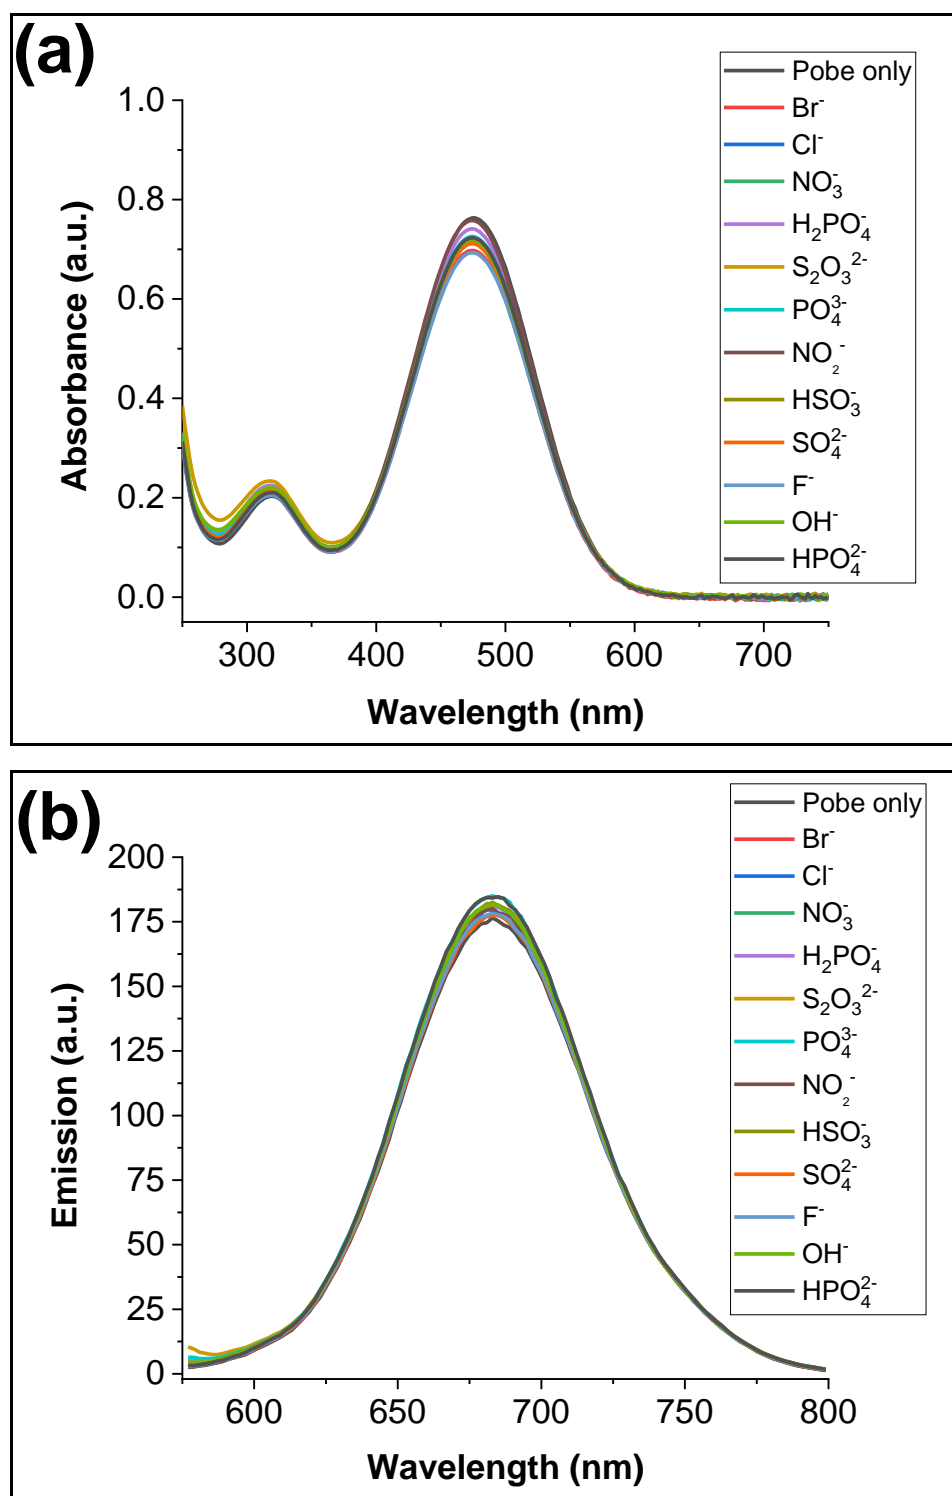

**Figure S6.1** Absorbance (a) and emission (b) spectra acquired for probe **1a** ( $10 \times 10^{-6}$  M) in water: acetonitrile (1:1) with the addition of various anionic species (10 equivalence) at

room temperature. Probe was excited at 500 nm and the emissions were collected from 530nm to 800 nm.

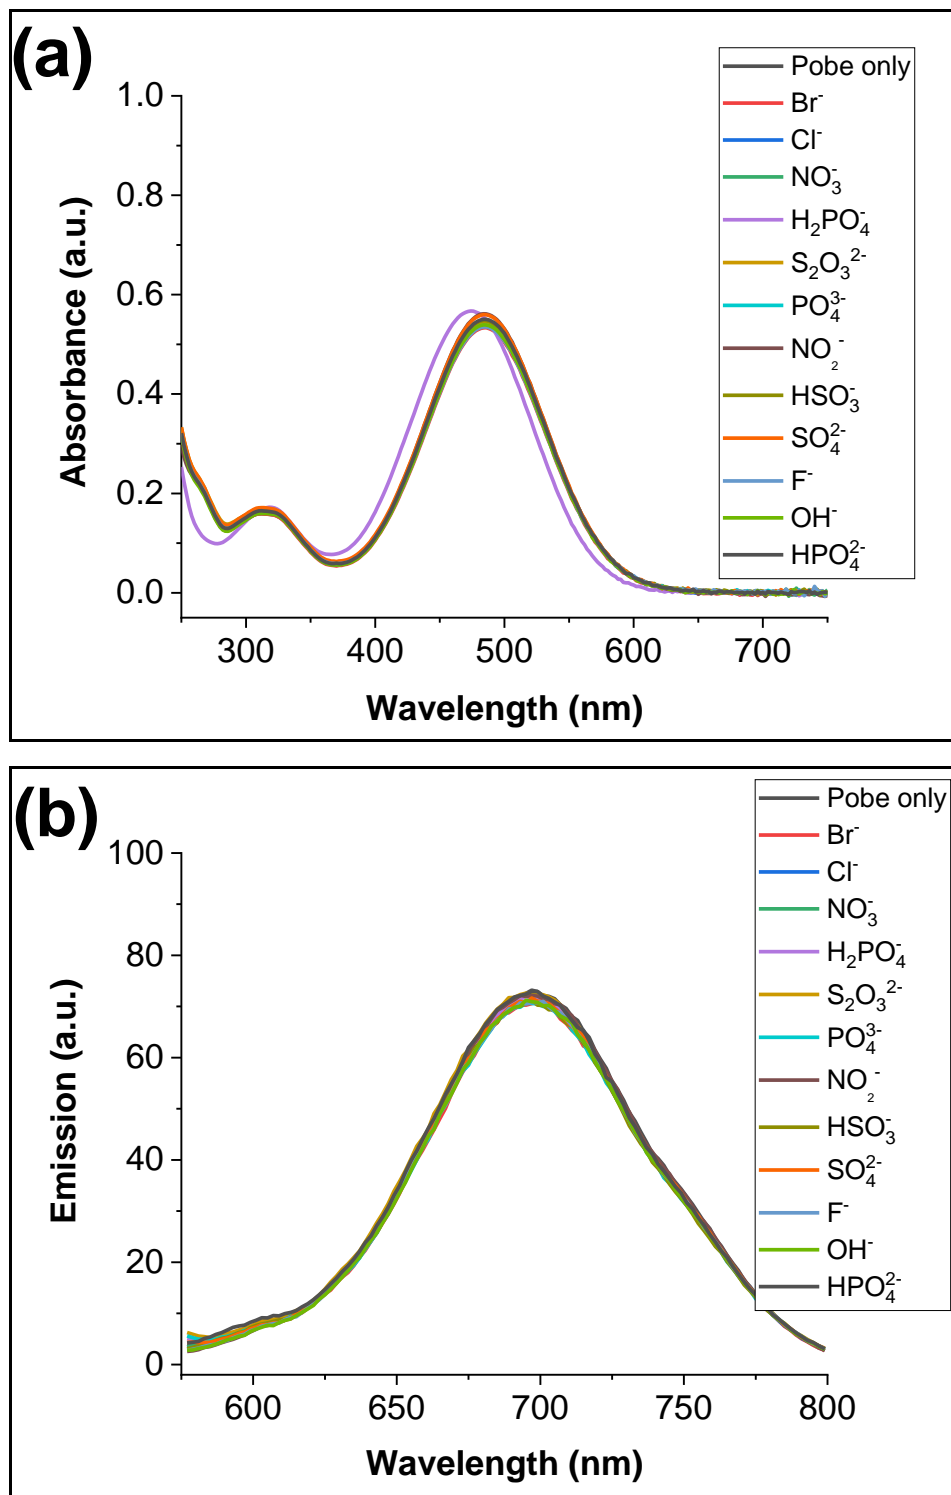

**Figure S6.2** Absorbance (a) and emission (b) spectra acquired for probe **1b** ( $10 \times 10^{-6}$  M) in water: acetonitrile (1:1) with the addition of various anionic species (10 equivalence) at

room temperature. Probe was excited at 500 nm and the emissions were collected from 530nm to 800 nm.

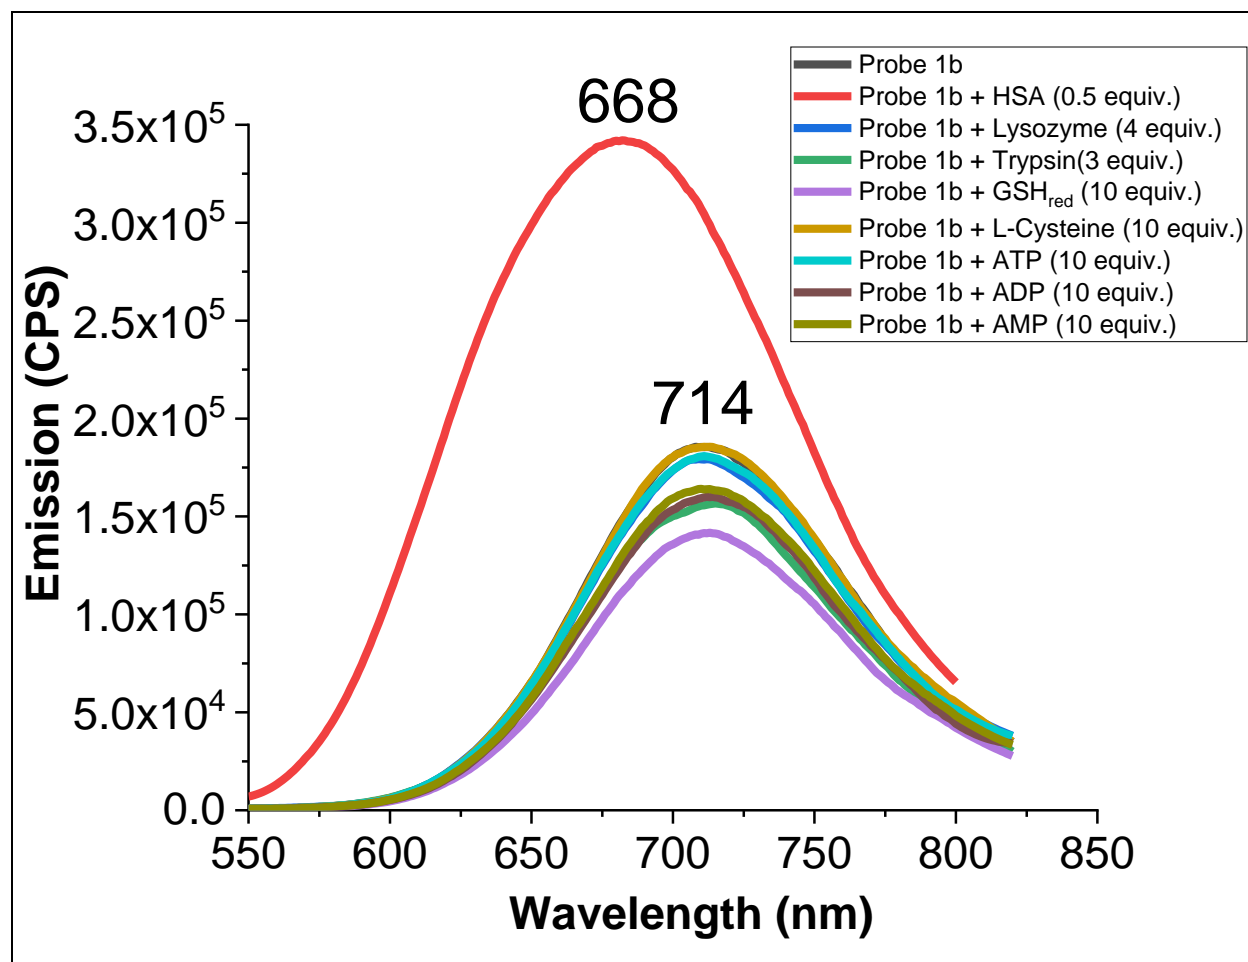

**Figure S6.3** Emission spectra acquired for probe **1b** ( $10 \times 10^{-6}$  M) in water upon addition of different biologically important species at room temperature. Probe was excited at 520 nm and the emissions were collected from 540nm to 800 nm.

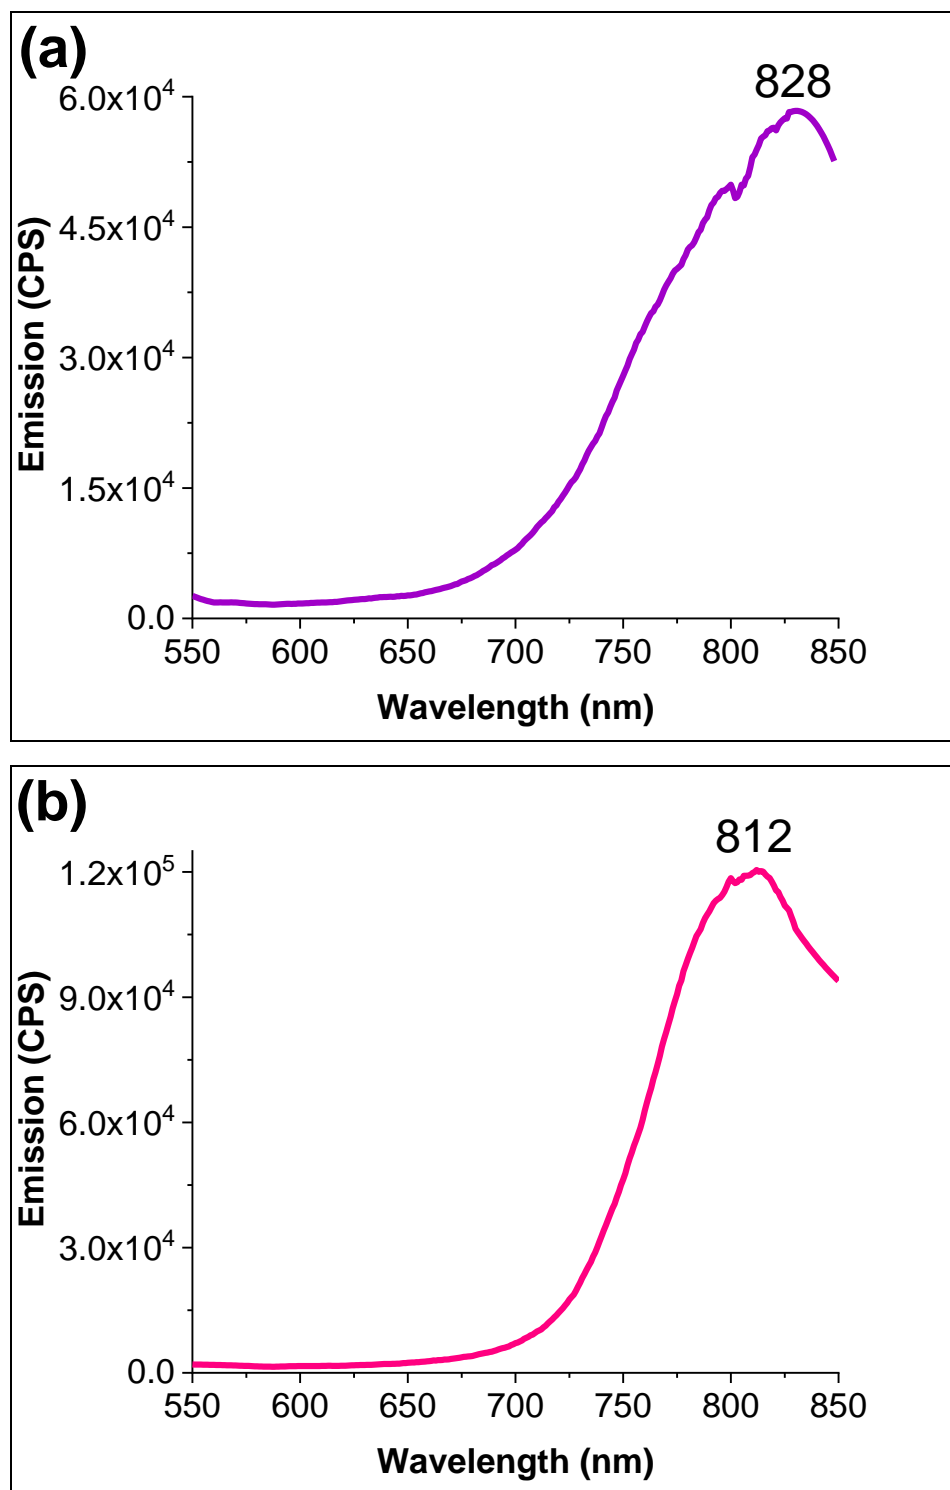

**Figure S7** Solid-state fluorescence spectra acquired for probes **1a** and **1b** at room temperature. Both probes were excited at 520 nm and the emissions were collected from 550 nm to 850 nm.

**Table S1.1 Limit of detection (LOD) and limit of quantification (LOQ) calculation for 1a with HSA**

SUMMARY  
OUTPUT

| <i>Regression Statistics</i> |          |
|------------------------------|----------|
| Multiple R                   | 0.993976 |
| R Square                     | 0.987988 |
| Adjusted R Square            | 0.986653 |
| Standard Error               | 0.188422 |
| Observations                 | 11       |

ANOVA

|            | <i>df</i> | <i>SS</i> | <i>MS</i> | <i>F</i> | <i>Significance F</i> |
|------------|-----------|-----------|-----------|----------|-----------------------|
| Regression | 1         | 26.28095  | 26.28095  | 740.2506 | 5.93E-10              |
| Residual   | 9         | 0.319525  | 0.035503  |          |                       |
| Total      | 10        | 26.60047  |           |          |                       |

|              | <i>Coefficients</i> | <i>Standard Error</i> | <i>t Stat</i> | <i>P-value</i> | <i>Lower 95%</i> | <i>Upper 95%</i> | <i>Lower 95.0%</i> | <i>Upper 95.0%</i> |
|--------------|---------------------|-----------------------|---------------|----------------|------------------|------------------|--------------------|--------------------|
| Intercept    | 0.056001            | 0.106284              | 0.526902      | 0.611          | -0.18443         | 0.296433         | -0.18443           | 0.296433           |
| X Variable 1 | 19.55168            | 0.718613              | 27.20755      | 5.93E-10       | 17.92607         | 21.1773          | 17.92607           | 21.1773            |

SE of Intercept 0.106284  
SD of Intercept 0.352505  
**LOD** 0.059496  
**LOQ** 0.180291



**Table S1.2 Limit of detection (LOD) and limit of quantification (LOQ) calculation for 1b with HSA**

SUMMARY  
OUTPUT

| <i>Regression Statistics</i> |          |
|------------------------------|----------|
| Multiple R                   | 0.996892 |
| R Square                     | 0.993794 |
| Adjusted R Square            | 0.993105 |
| Standard Error               | 0.45985  |
| Observations                 | 11       |

ANOVA

|            | <i>df</i> | <i>SS</i> | <i>MS</i> | <i>F</i> | <i>Significance F</i> |
|------------|-----------|-----------|-----------|----------|-----------------------|
| Regression | 1         | 304.7769  | 304.7769  | 1441.287 | 3.03E-11              |
| Residual   | 9         | 1.903154  | 0.211462  |          |                       |
| Total      | 10        | 306.6801  |           |          |                       |

|              | <i>Coefficients</i> | <i>Standard Error</i> | <i>t Stat</i> | <i>P-value</i> | <i>Lower 95%</i> | <i>Upper 95%</i> | <i>Lower 95.0%</i> | <i>Upper 95.0%</i> |
|--------------|---------------------|-----------------------|---------------|----------------|------------------|------------------|--------------------|--------------------|
| Intercept    | 0.023395            | 0.25939               | 0.090192      | 0.93011        | -0.56339         | 0.610176         | 0.56339            | 0.610176           |
| X Variable 1 | 66.58167            | 1.753797              | 37.96429      | 3.03E-11       | 62.6143          | 70.54903         | 62.6143            | 70.54903           |

SE of Intercept 0.25939  
SD of Intercept 0.8603  
LOD 0.042639  
LOQ 0.129209
